# Supplementary material for: Different glacier status with atmospheric circulations in Tibetan Plateau and surroundings
Source: Springer Nature journal article supplement (doi:10.1038/nclimate1580), 2012-07-13
Supplement: 41558_2012_BFnclimate1580_MOESM396_ESM.pdf [file 41558_2012_BFnclimate1580_MOESM396_ESM.pdf]

## Different glacier status with atmospheric circulations in Tibetan

### Plateau and surroundings

Tandong Yao<sup>1,3,\*</sup>, Lonnie Thompson<sup>2,1</sup>, Wei Yang<sup>1</sup>, Wusheng Yu<sup>1</sup>, Yang Gao<sup>1</sup>, Xuejun Guo<sup>1</sup>, Xiaoxin Yang<sup>1</sup>, Huabiao Zhao<sup>1</sup>, Keqin Duan<sup>3,1</sup>, Baiqing Xu<sup>1</sup>, Jiancheng Pu<sup>3</sup>, Anxin Lu<sup>3,1</sup>, Dahe Qin<sup>3</sup>, Yang Xiang<sup>1</sup>, Dambaru B. Kattel<sup>1</sup>, Daniel Joswiak<sup>1</sup>

<sup>1</sup>*Key Laboratory of Tibetan Environmental Changes and Land Surface Processes, Institute of Tibetan Plateau Research, Chinese Academy of Sciences, Beijing, 100101, China.*

<sup>2</sup>*Byrd Polar Research Center and School of Earth Sciences, Ohio State University, Columbus, OH 43210, USA.*

<sup>3</sup>*State Key Laboratory of Cryosphere Sciences, Chinese Academy of Sciences, Lanzhou 730000, China.*

\*corresponding author:

Email: [tdyao@itpcas.ac.cn](mailto:tdyao@itpcas.ac.cn)

4A Datun Rd., Chaoyang District, Beijing, P.R. China

## 1 **Supporting Online Material**

2       Glacial area in the Tibetan Plateau (TP) and surroundings is still an issue to be  
3 precisely inventoried. Here we provide a figure of ~100, 000 km<sup>2</sup> in Table S1 based  
4 on studies of Yao et al.<sup>1</sup> and Dyurgerov<sup>32</sup>.

5       There are many publications in Chinese journals about glacial fluctuations in  
6 China<sup>33-50</sup>. Those studies showed different pictures of glacier fluctuations. Some  
7 indicated heterogeneous retreat magnitudes in different areas, with the largest retreat  
8 in the margin of the TP and decreasing to the interior<sup>33-43</sup>, while others showed a few  
9 advancing glaciers in the southeastern TP and central Himalayas<sup>46-47</sup>. However, Jin et  
10 al.<sup>47</sup> admitted, from their own experiences, that the ‘advancing glaciers’ might be  
11 misled by satellite images with heavy snow and shadow. Two advancing glaciers  
12 interpreted from early satellite images in the paper of Liu et al.<sup>46</sup> are also retreating  
13 glaciers according to more reliable satellite images. Some studies emphasized the  
14 unique response of debris-covered glaciers to climate changes<sup>15,51,52</sup>. A few studies of  
15 in situ observation of glacial length and mass balance do exist<sup>53,54</sup>, but are too sparse  
16 to shed light on a holistic picture of glacial fluctuations of the region. Recently some  
17 more data are published in the southern TP and Himalayas using new technologies  
18 and methods<sup>52</sup>. The situation thus underlines the necessity for a comprehensive study  
19 of glacial area based on satellite images and in situ glacial length and glacial mass  
20 balance. This is the major purpose of our study in this paper.

## 21 **1. Glacier area reduction**

23       Glacier area change is studied using remote sensing images and topographic maps.  
24 Among the glacial area analysis of 16 river basins in seven regions, nine are based on  
25 literatures and seven are based on our studies (four had not been published). It’s  
26 important to evaluate its potential uncertainty. The accuracy of glacier delineation  
27 based on remote sensing images depends on the resolution of the utilized image, the  
28 conditions at the time of the acquisition (especially seasonal snow) and the knowledge  
29 of the operator to decide the lake region, glacier in cast shadow, perennial or seasonal  
30 snow, debris-covered area and location of ice divides and might be subjective<sup>55</sup>. The  
31 mapping uncertainty of our studies is less than 3% for clean-ice glaciers and 4% for  
32 debris-covered glaciers in the Boshula Mountain Range, Southeastern Tibet, Koshi  
33 River Basin Nepal, Mapam Yumco Basin, Geladandong and Shulenan Mountain. This

34 is similar with previous studies, which reported a mapping uncertainty of  $\pm 2\text{-}3\%$  for  
35 clean-ice glacier<sup>56,57</sup>, of  $\pm 3\text{-}4\%$  for debris-covered glacier for ASTER, Landsat TM by  
36 comparison with other high-resolution images or estimation<sup>58</sup>. However, it's difficult  
37 to evaluate the uncertainty of the result from previous studies (cited in this study),  
38 since they were from different operators using different methods. To reduce large  
39 uncertainty, we only use the results of the studies with similar resolution images  
40 (Landsat or ASTER) and at the end of snow season. The uncertainty is no more than  
41 5%.

42 There are totally 7,090 glaciers ( $\sim 13,363.5 \text{ km}^2$ ) analyzed for glacial area  
43 reduction in this study. We have measured 2,135 glaciers ( $\sim 3154.5 \text{ km}^2$ ) based on  
44 digitized glacier inventories from topographic maps and remote sensing images in six  
45 river basins in the TP and surroundings. The other 4,955 glaciers ( $\sim 10209.0 \text{ km}^2$ ) were  
46 summarized from the results of previous studies<sup>59-69</sup>.

47 The locations of studied glaciers for area reduction are shown in Figure S1 and  
48 Table S2. The total glacier area of 7,090 glaciers has decreased from  $13,363.5 \text{ km}^2$  to  
49  $12,130.7 \text{ km}^2$  in the period between the 1970s and 2000s. The average decreasing rate  
50 is  $\sim -0.30\% \text{ a}^{-1}$  for the TP and surroundings, but different from region to region, with  
51 the largest ( $-0.57\% \text{ a}^{-1}$ ) in Region I and the smallest ( $-0.07\% \text{ a}^{-1}$ ) in Region V (Table  
52 S3).

53 We have also compared retreat magnitude of different glacier sizes in different  
54 regions. Figure S2 summarized the change of glacial area with different sizes in  
55 different regions. According to the sizes, glaciers were classified into four types:  
56  $<1 \text{ km}^2$ ,  $1.0\text{-}5.0 \text{ km}^2$ ,  $5.0\text{-}10.0 \text{ km}^2$  and  $>10 \text{ km}^2$ . Although the change rate of smaller  
57 glaciers is larger than that of larger glaciers in all the regions, the general pattern of  
58 glacial retreat is controlled by regional climate. In a region with the same climate  
59 dominance, such as monsoon or westerlies, glaciers undergo similar retreat tendency,  
60 no matter what sizes the glaciers are.

61

## 62 **2. Glacial length fluctuation**

63 We have analyzed glacial length fluctuation of 82 glaciers from the 1970s to  
64 2000s. Among them, the length fluctuation of 13 glaciers is based on our *in situ*  
65 observations and that of the other 69 is summarized from previous studies<sup>70-89</sup>. The  
66 general pattern of glacial length fluctuation shows more intensive retreat in the

67 Himalayas, with largest retreat of three glaciers in the southeastern TP or the eastern  
68 Himalayas and moderate retreat of eight glaciers in the central Himalayas and 20  
69 glaciers in the western Himalayas, and decreasing retreat of five glaciers in the  
70 interior northeastern TP and five glaciers in the Nyainqentanglha Mountain, and stable  
71 or even advancing characteristics in the eastern Pamir regions and west Kunlun  
72 Mountains (among the 41 glaciers, 17 retreated and 10 were stable, while 14  
73 advanced).

74

### 75 **3 . Glacial mass balance change**

#### 76 **3.1 Current status of glacial mass balance**

77 We have analyzed 15 glaciers to assess the current mass balance status in the TP  
78 and surroundings (Table S6-S7). Among them, 11 glaciers are based on our *in situ*  
79 measurements and the other four are summarized from previous studies<sup>90-92</sup>. The  
80 results of the 11 glaciers are presented in the following:

##### 81 **The Parlung No.10 Glacier**

82 The Parlung No.10 Glacier (29°17'N, 96°54'E) is a valley glacier (Figure S3a)  
83 flowing from 4,900 to 5,625 m, with an area of 2.1 km<sup>2</sup> and a length of 3.5 km. A total  
84 of 11 measuring stakes have been distributed on this glacier. Figure S3c shows the  
85 significant variations of spatial distribution of net mass balance year by year,  
86 accompanied with ELAs fluctuations (Figure S3b) (data for 2009/10 is absent due to  
87 measuring stakes falling down). 2008/09 is the most negative mass balance year we  
88 have measured, shown both by the spatial distribution of net balance (negative almost  
89 on the whole glacier, shown in Figure S3c and Table S7) and ELA (Figure S3b). The  
90 ELAs in the past four years have shifted from 5,419m to 5,500m, and nearly reached  
91 the glacier summit in 2008/09.

##### 92 **The Parlung No.12 Glacier**

93 The Parlung No.12 Glacier (29°18'N, 96°54'E) is a small cirque glacier with an  
94 area of about 0.2 km<sup>2</sup> and a length of nearly 0.6 km (Figure S4a). Its elevation ranges  
95 from 5,130 to 5,265 m. A total of 5 measuring stakes have been distributed on this  
96 glacier. The spatial distribution of net balance demonstrates negative net balance on  
97 the whole glacier every year (Figure S4c) and the ELAs have already risen beyond the  
98 glacier summit during the period of measurement. This glacier is now suffering from  
99 significant mass deficit.

100 **The Parlung No.94 Glacier**

101 The Parlung No.94 Glacier (29°23'N, 96°59'E) is a valley glacier with an area of  
102 2.5 km<sup>2</sup>, a length of 2.9 km and its elevation range from 5,000 to 5,635 m (Figure  
103 S5a). A total of 19 measuring stakes have been spatially distributed on this glacier.  
104 With similar glacier area and altitudinal range, both the spatial distribution of net  
105 balance and ELAs variations show a similar pattern with the Parlung No.10 Glacier  
106 (Figures S5b-c). The most negative mass balance with the highest ELA occurs in  
107 2008/09.

108 **The Parlung No.390 Glacier**

109 The Parlung No.390 Glacier (29°21'N, 97°01'E) flows from an elevation of 5,160  
110 to 5,460 m, with an area of about 0.5 km<sup>2</sup> and a length of 1.2 km (Figure S6a). A total  
111 of 5 measuring stakes have been distributed along the central axis of this glacier.  
112 Located in the same region with the Parlung No.10, 12 and 94 Glacier, the spatial  
113 distribution of net balance and ELAs of the Parlung No.390 Glacier also show a  
114 similar pattern (Figures S6b-c).

115 **The Gurenhekou Glacier**

116 The Gurenhekou Glacier (30°11'N, 90° 28'E, area 1.4 km<sup>2</sup>, length 2.9 km) lies near  
117 the town of Yangbajin on the southern slope of Nyainqentanglha Mountain. The  
118 glacier ranges from 6,040 to 5,525 m in elevation (Figure S7a). A total of 12  
119 measuring stakes have been spatially distributed on this glacier. Different from the  
120 four glaciers in the southeastern TP, the circumstance of spatial distribution of  
121 negative net balance on the whole glacier did not occur on the Gurenhekou Glacier. In  
122 contrast, the mass balance is positive(Figure S7c) with descending ELA (Figure S7b)  
123 in 2007/08.

124 **The Zhongxi Glacier**

125 The Zhongxi Glacier (30°52'N, 91°27'E, area 1.6 km<sup>2</sup>, length 2.6 km) lies on the  
126 northeastern Nyainqentanglha Mountain Range, near the Npen Co lake (Figure S8a).  
127 The elevations of the glacier summit and terminus are 6,210 and 5,376 m, respectively.  
128 A total of 16 measuring stakes have been spatially distributed on this glacier. The  
129 three-year measurements of this glacier show a similar pattern of spatial distribution  
130 of net balance and ELA with the Gurenhekou Glacier. Slight positive mass balance  
131 occurred in 2007/08 (Figures S8b-c).

132 **The Kangwure Glacier**

133 The Kangwure Glacier (28°28'N 85°49'E, area 1.9 km<sup>2</sup>, length 3.1 km) lies on the

134 northern slope of central Himalayas range, near the Xixiabangma Mountain (Figure  
135 S9a). The glacier ranges from 6,060 to 5,690 m. A total of 16 measuring stakes have  
136 been spatially distributed on this glacier. Due to lack of mass balance measurement in  
137 2006, we take the average between 2005/06 and 2006/07 for 2005/06 and 2006/07,  
138 respectively. The data in 2007/08 is absent due to measuring stakes falling down.  
139 Located in the northern slope of Himalayas, the spatial distribution of net balance and  
140 ELAs show intensive mass loss (Figure S9b, 9c) although the average elevation of  
141 this glacier is very high. The spatial distribution of net balance is negative on the  
142 whole glaciers in 2005/07.

#### 143 **The Naimona'nyi Glacier**

144 The Naimona'nyi Glacier (30°27'N, 81°20'E) is located in the northern slope of  
145 west Himalayas and is a valley glacier with an area of 7.8 km<sup>2</sup> and a length of 7.7 km  
146 (Figure S10a). Its altitudinal range is between 5,465 and 7,520 m. 16 measuring stakes  
147 have been spatially distributed on this glacier. Due to lack of measurement in 2006,  
148 we take the average between 2005/06 and 2006/07 for 2005/06 and 2006/07,  
149 respectively. This glacier suffers from significant mass deficit, with particular  
150 circumstance of negative net balance on the whole glacier between 2005/06 and  
151 2006/07 (Figure S10c). An earlier study indicated that the glacier deficit status may  
152 have lasted for a long time<sup>93</sup>.

#### 153 **The Muztag Ata Glacier**

154 The Muztag Ata Glacier (38°14'N, 75°03'E) is located in West Kunlun Mountain.  
155 This glacier has an area of 0.96 km<sup>2</sup>, with a length of 1.8 km (Figure S11a). Its  
156 altitudinal range is between 5,235 and 5,940 m. A total of 13 measuring stakes have  
157 been spatially distributed on this glacier. Due to lack of measurement in 2009, we take  
158 the average between 2008/09 and 2009/10 for 2008/09 and 2009/10, respectively. The  
159 spatial distributions of net balance are positive almost on the whole glacier during the  
160 period, except in 2002/03 (Figure S11c).

#### 161 **The Xiaodongkemadi Glacier**

162 The Xiaodongkemadi Glacier (33°04'N, 92°05'E) is located at the headwaters of  
163 the Dongkemadi river, a tributary at the upper reaches of the Buqu River near the  
164 Tanggula pass. The Glacier is 1.8 km<sup>2</sup> in area, with a length of 2.8 km (Figure S12a).  
165 The elevations of the summit and terminus of the glacier are 5,926 and 5,380 m,  
166 respectively. A total of 25 measuring stakes were set up on the glacier. The most  
167 significant phenomena of the Xiaodongkemadi Glacier is negative net balance in

168 2009/10 (-1,066 mm), which is higher than that in 2007/08 (-80 mm) and 2008/09  
169 (-91mm) by one order (Figures S12b-c).

### 170 **The Qiyi Glacier**

171 The Qiyi Glacier (39°15'N, 97°45'E) is located on the northern slope of Qilian Mts.  
172 Its area is 2.87 km<sup>2</sup>, with a length of 3.8 km (Figure S13a). Its altitudinal range is  
173 between 4,304 and 5,159 m. A total of 28 measuring stakes were set up on the glacier.  
174 Similar with the Xiaodongkemadi Glacier, the mass balance is much more negative  
175 (-648 mm) in 2009/10, comparing with that in 2007/08 (-105 mm) and 2008/09 (-74  
176 mm).

177 Generally, all the 11 glaciers show negative mass balance in the five years of  
178 measurement, except the Muztag Ata Glacier that shows positive mass balance in the  
179 past four years (Table S7). The most negative mass balance is observed in the  
180 southeastern TP, while positive mass balance is observed in the eastern Pamir regions.

181

### 182 **3.2. Long-time series of mass balance**

183 There are three glaciers with mass balance starting from the early 1990s or earlier.  
184 The Xiaodongkemadi Glacier has been continuously measured for mass balance  
185 starting from 1988/89. Otherwise, the Qiyi and Kangwure Glaciers have ten-year and  
186 two-year, respectively, *in situ* measurements before 2005. We have reconstructed the  
187 past mass balance using the relationship between the measured mass balance and  
188 meteorological data (Table S8). For the Qiyi Glacier, the *in situ* mass balance  
189 measurement first started in 1974/75 and measured discontinuously since. Wang et al  
190 (2010)<sup>94</sup> established a statistical model between ELAs and meteorological factors  
191 (warm air temperature and cold-season precipitation) on the basis of measurement of  
192 the ELAs. The reconstructed ELAs agreed well with the measured data. In this study,  
193 based on this model, we have reconstructed annual mass balances ( $B_n$ ) in the Qiyi  
194 Glacier ( $B_n = 11456 - 2.44 \times \text{ELA}$ ,  $n=12$ ,  $R^2=0.92$ ). Figure S14 shows the comparison  
195 between the simulated annual mass balances with *in situ* measurements. The  
196 simulated mass balance agrees well with the measurements.

197 For the Kangwure Glacier, we have used mass balance data of 1991/92 and  
198 1992/93<sup>95</sup>, and that between 2005/06 and 2009/10. We used the meteorological data at  
199 Dingri meteorological station (about 100 km away from the Kangwure Glacier) to  
200 analyze the relationship between mass balance and meteorological factors. A

201 regression model was used to reconstruct the mass balance since 1991/92 based on the  
202 meteorological factors (annual air temperature (T) and precipitation (P)) and 5-year *in*  
203 *situ* mass balance observations (the linear regression is  $B_n = -350 \times T + 2.36 \times P - 22.4$ ,  
204  $n=5$ ,  $R^2=0.61$ ) (Figure S15). The reconstructed mass balance data are shown in Table  
205 S8.

### 206 **3.3 Climate controls over glacial mass balance**

207 We've studied glacial mass balance of 11 glaciers on the TP. Mass balance  
208 measurement of glaciers with different sizes under different climate regimes  
209 demonstrates heterogeneous mass loss as shown in Figure S16. In the monsoonal  
210 region where precipitation is decreasing, glacial mass balance is the most negative. In  
211 contrast, in the westerly region where precipitation is increasing, glacial mass balance  
212 is positive. Glacial mass balance is moderate in the transitional region.

## 213 **4. Contrast precipitation trends between Himalayas and** 214 **Pamir regions**

215 It was first proposed by Yao et al.<sup>96</sup>, and Liu and Chen<sup>23</sup> that the amplitude of  
216 temperature change increases with elevations. Latest study by Frauenfeld et al.<sup>97</sup>, Qin  
217 et al.<sup>24</sup>, Kang et al.<sup>54</sup> and You et al.<sup>98</sup> found that, the TP is warming, and the warming  
218 rate increases with elevation before becoming quite stable with a slight decline near  
219 the highest elevations. However, by examining Figure 4 in Qin et al.<sup>24</sup>, we found that  
220 the warming rate is most intensive between 4,800 and 6,200 m a.s.l, which covers the  
221 ablation area of almost all glaciers in the TP. This is still not conclusive, and more  
222 studies are necessary to narrow down the uncertainties before a definite conclusion is  
223 drawn.

224 Precipitation is a very important factor contributing to the glacial mass balance  
225 change. This is particularly the case in the TP and surroundings. The most intensive  
226 glacial shrinkage in the Himalayas coincides with the decreasing precipitation  
227 accompanied by the weakening Indian monsoon and the least intensive glacial  
228 shrinkage in the eastern Pamir regions is linking with the increasing precipitation  
229 accompanied by the strengthening westerlies (Figure 4 in the Text). The trends of  
230 decreasing precipitation in the Himalayas and increasing precipitation in the eastern  
231 Pamir regions are further supported by the Global Precipitation Climatology Project  
232 (GPCP) dataset<sup>99</sup> for the period 1979–2010. The precipitation series in the four grids



233 numbered as 1-4 in Figure 4a in the eastern Pamir regions show statistically  
234 significant increasing trends at the 99% confidence level using the Mann-Kendall test  
235 (Figure S17). The precipitation series numbered as 5-8 and 14-16 in Figure 4a in the  
236 Himalayas exhibit statistically significant decreasing trends at the 99% confidence  
237 level (Figure S18). The series numbered as 9-13 are not as significant as those of 5-8  
238 and 14-16, but still show obvious decreasing trends.

239       Figure S19 shows the seasonality of the precipitation at Linzhi, Bomi and Zayu  
240 stations in the Indian monsoon-dominated Himalayas and at Taxkorgon station in the  
241 westerlies-dominated Pamir regions, indicating strong seasonality characterized by  
242 high precipitation in the summer and low precipitation in the winter. Figure S20  
243 shows the spatial features of GPCP seasonal precipitation trend in the summer and  
244 winter during 1979-2010. The results show a similar spatial pattern of the seasonal  
245 precipitation to that of annual precipitation (Figure 4a) in the text, demonstrating  
246 decreasing precipitation in the eastern Himalayas and increasing precipitation in the  
247 eastern Pamir regions. The decreasing trend is more intensive in the summer in the  
248 Indian monsoon-dominated Himalayas (Figure S20a), confirming the weakening  
249 Indian monsoon; while the increasing trend is more intensive in the winter in the  
250 westerlies-dominated Pamir regions (Figure S20b), confirming the strengthening  
251 westerlies.

252 **Supplementary Tables**

253 **Supplementary Table S1.** Distribution of Glaciers in the TP and surroundings calculated from Yao et al<sup>1</sup>  
 254 and Dyurgerov<sup>32</sup>

| <b>Region</b>     | <b>Glacier area (km<sup>2</sup>)</b> |
|-------------------|--------------------------------------|
| Pamir             | 12,260                               |
| Qilian            | 1,931                                |
| Kunlun            | 12,267                               |
| Karakoram         | 16,600                               |
| Qiangtang Plateau | 2,581                                |
| Tanggula          | 2,213                                |
| Gangdise          | 1,760                                |
| Nyainqingtanglha  | 9,120                                |
| Hengduan          | 1,579                                |
| Himalayas         | 33,050                               |
| Gindukush         | 3,200                                |
| Hinduradash       | 2,700                                |
| <b>Total</b>      | <b>99,261</b>                        |

| Studied regions | Basin                                                | Periods   | Data                                              |                                        | Methods                                                                            |
|-----------------|------------------------------------------------------|-----------|---------------------------------------------------|----------------------------------------|------------------------------------------------------------------------------------|
|                 |                                                      |           | 1970s                                             | 2000s                                  |                                                                                    |
| I               | Boshula Mountain Range*                              | 1975-2001 | Topographic Map                                   | ALOS AVNIR-2                           | Manual Delineation (MD)<br>Band ratio TM3/TM5, TM4/TM5<br>& Manual Adjustment (MA) |
|                 | Southeastern Tibet*                                  | 1980-2001 | Topographic Map/Landsat TM                        | Landsat ETM +/ASTER GDEM               |                                                                                    |
| II              | Nam Co Basin* <sup>59</sup>                          | 1976-2001 | Hexangon KH-9/ Landsat MSS                        | Landsat ETM+ / Terra ASTER             | Band ratio TM3/TM5 & MA<br>MD                                                      |
|                 | Southeast of West Nyainqentanglha <sup>60</sup>      | 1970-2000 | Aerial Photography<br>Topographic map/Landsat MSS | Landsat ETM+<br>Landsat TM/ ASTER GDEM |                                                                                    |
| III             | Mt.Qomolangma National Nature Preserve <sup>61</sup> | 1976-2006 | Topographic map/Landsat MSS                       | Landsat ETM+/USGS SRTM                 | NDSI&NDWI&MA<br>Band ratio TM3/TM5, TM4/TM5<br>& MA                                |
|                 | Koshi Basin Nepal*                                   | 1976-2000 |                                                   |                                        |                                                                                    |
| IV              | Mapam Yumco Basin* <sup>62</sup>                     | 1974-2003 | Topographic map                                   | Landsat ETM+ / Terra ASTER             | MD<br>Supervised classification & MA                                               |
|                 | Naimona'Nyi Region <sup>63</sup>                     | 1976-2003 | Topographic Map/Landsat MSS                       | Landsat ETM+ / Terra ASTER             |                                                                                    |
| V               | Himachal Pradesh <sup>64</sup>                       | 1962-2001 | Topographic map                                   | LISS-III/LISS-IV                       | MD                                                                                 |
|                 | Muztag Ata <sup>65</sup>                             | 1965-2001 | Topographic Map                                   | Terra ASTER                            | MD                                                                                 |
|                 | Yurungkax River <sup>66</sup>                        | 1970-2001 | Aerial Photography                                | Landsat ETM +                          | NDSI&MD                                                                            |
| VI              | Karamilan-Keriya River <sup>67</sup>                 | 1970-1999 | Topographic Map                                   | Landsat ETM +                          | MD & Band ratio TM3/TM5<br>MD                                                      |
|                 | Dongkemadi Region <sup>68</sup>                      | 1969-2001 | Aerial Photography                                | Landsat ETM +                          |                                                                                    |
| VII             | Geladandong*                                         | 1969-2000 | Aerial Photography/ Topographic map               | Landsat TM                             | MD                                                                                 |
|                 | Xinqingfeng Ice Cap <sup>69</sup>                    | 1971-2000 | Aerial Photography                                | Landsat ETM +                          | MD                                                                                 |
| VII             | Shulenan Mountain*                                   | 1970-1999 | Topographic map                                   | Landsat ETM +                          | MD                                                                                 |

256 Note: \* represent our studies.

257

258 **Supplementary Table S3.** Glacial area reduction during the past three decades from remote sensing images in the TP and surroundings

| Studied regions | Basin                                                | Periods   | 1970s        |                               | 2000s        |                               | Total Area Change (km <sup>2</sup> ) | Percentage of Annual Area Change (%/y) | Regional Number | Regional Average (%/y) |
|-----------------|------------------------------------------------------|-----------|--------------|-------------------------------|--------------|-------------------------------|--------------------------------------|----------------------------------------|-----------------|------------------------|
|                 |                                                      |           | Total number | Total area (km <sup>2</sup> ) | Total number | Total area (km <sup>2</sup> ) |                                      |                                        |                 |                        |
| I               | Boshula Mountain Range*                              | 1975-2001 | 150          | 167.5                         | 150          | 155.0                         | -12.5                                | -0.276                                 | 279             | -0.57                  |
|                 | Southeastern Tibet*                                  | 1980-2001 | 129          | 217.9                         | 154          | 174.6                         | -43.3                                | -0.903                                 |                 |                        |
| II              | Nam Co Basin* <sup>59</sup>                          | 1976-2001 | 305          | 212.5                         | 305          | 198.1                         | -14.4                                | -0.261                                 | 917             | -0.20                  |
|                 | Southeast of West Nyainqentanglha <sup>60</sup>      | 1970-2000 | 612          | 682.4                         | 612          | 646.6                         | -35.8                                | -0.169                                 |                 |                        |
| III             | Mt.Qomolangma National Nature Preserve <sup>61</sup> | 1976-2006 | 2196         | 3212.1                        | 2196         | 2710.2                        | -501.9                               | -0.504                                 | 3036            | -0.41                  |
|                 | Koshi Basin Nepal*                                   | 1976-2000 | 840          | 1121.6                        | 840          | 1079.3                        | -42.3                                | -0.151                                 |                 |                        |
| IV              | Mapam Yumco Basin* <sup>62</sup>                     | 1974-2003 | 242          | 107.4                         | 242          | 100.1                         | -7.3                                 | -0.227                                 | 806             | -0.42                  |
|                 | Naimona'Nyi Region <sup>63</sup>                     | 1976-2003 | 98           | 87.0                          | 98           | 79.4                          | -7.6                                 | -0.312                                 |                 |                        |
| V               | Himachal Pradesh <sup>64</sup>                       | 1962-2001 | 466          | 2077.0                        | 466          | 1628.0                        | -449                                 | -0.540                                 | 1395            | -0.07                  |
|                 | Muztag Ata <sup>65</sup>                             | 1965-2001 | 128          | 377.2                         | 128          | 373.0                         | -4.2                                 | -0.030                                 |                 |                        |
| VI              | Yurungkax River <sup>66</sup>                        | 1970-2001 | 372          | 1777.0                        | 365          | 1772.0                        | -5                                   | -0.009                                 | 378             | -0.10                  |
|                 | Karamilan-Keriy River <sup>67</sup>                  | 1970-1999 | 895          | 1374.2                        | 890          | 1334.9                        | -39.3                                | -0.095                                 |                 |                        |
| VII             | Dongkemadi Region <sup>68</sup>                      | 1969-2001 | 124          | 179.4                         | 124          | 167.4                         | -12                                  | -0.203                                 | 279             | -0.29                  |
|                 | Geladandong*                                         | 1969-2000 | 190          | 899.3                         | 190          | 884.4                         | -14.9                                | -0.052                                 |                 |                        |
| VII             | Xinqingfeng Ice Cap <sup>69</sup>                    | 1971-2000 | 64           | 442.7                         | 64           | 436.2                         | -6.5                                 | -0.049                                 | 7090            | -0.30                  |
|                 | Shulenan Mountain*                                   | 1970-1999 | 279          | 428.3                         | 279          | 391.5                         | -36.88                               | -0.287                                 |                 |                        |
| <b>Total</b>    |                                                      |           | <b>7090</b>  | <b>13363.5</b>                | <b>7103</b>  | <b>12130.7</b>                | <b>-1232.88</b>                      |                                        |                 |                        |

259 Note:\* represent our studies. Regional average is calculated by  $RA = \sum_{i=1}^n P \times \left(\frac{T}{R}\right)$ ; RA is regional weighted average; P is the percentage of annual area change on each basin; T is number  
 260 of glaciers on each basin in 1970s, R is number of regional glaciers in 1970s; n is the number of basins on each region.

**Supplementary Table S4** Glacial length fluctuation in the TP and surroundings in the past three decades. \* represent our studies.

| Studied regions | Mountains         | Glacial Number | Glaciers                    | Latitude (N) | Longitude (E) | Area (km <sup>2</sup> ) | Length (km) | Orientation | Location            | Periods   | Total change (m) | Annual change (m/a) | Regional average (m/a) |
|-----------------|-------------------|----------------|-----------------------------|--------------|---------------|-------------------------|-------------|-------------|---------------------|-----------|------------------|---------------------|------------------------|
| I               | Southeast TP      | 1              | Ata*                        | 29°10′       | 96°48′        | 13.8                    | 16.7        | S           | Southeast TP        | 1973-2005 | -1795            | -56.1               | -48.2                  |
|                 |                   | 2              | Parlung No.4*               | 29°14′       | 96°55′        | 11.7                    | 8           | N           | Southeast TP        | 1980-2005 | -406             | -15.6               |                        |
|                 |                   | 3              | Yanong <sup>70</sup>        | 29°19′       | 96°42′        | 191                     | 32.5        | E/SE        | Southeast TP        | 1980-2001 | -1534            | -73                 |                        |
| II              | Nyainqentanglha   | 4              | Lanong <sup>71</sup>        | 30°26′       | 90°34′        | 7.46                    | 3.5         | N           | Nyainqentanglha Mt. | 1970-2007 | -401.7           | -13.2               | -16.3                  |
|                 |                   | 5              | Panu <sup>71</sup>          | 30°23′       | 90°31′        | 12.92                   | 8.4         | SE          | Nyainqentanglha Mt. | 1970-1999 | -179.6           | -10.2               |                        |
|                 |                   | 6              | Xibu <sup>71</sup>          | 30°23′       | 90°36′        | 31.6                    | 10.6        | E           | Nyainqentanglha Mt. | 1970-1999 | -1130.2          | -39                 |                        |
|                 |                   | 7              | Zhadang*                    | 30°29′       | 90°39′        | 2                       | 2.5         | NW          | Nyainqentanglha Mt. | 1970-2007 | -410.5           | -10.8               |                        |
|                 |                   | 8              | Gurenhekou*                 | 30°11′       | 90°27′        | 1.4                     | 2.9         | SE          | Nyainqentanglha Mt. | 1974-2004 | -252             | -8.1                |                        |
| III             | Central Himalayas | 9              | Middle Rongbu <sup>72</sup> | 28°03′       | 85°50′        | 85.4                    | 22.4        | N/NW        | Central Himalayas   | 1966-2001 | -315             | -8.8                | -6.3                   |
|                 |                   | 10             | East Rongbu <sup>72</sup>   | 28°03′       | 85°57′        | 46.3                    | 12.8        | NW          | Central Himalayas   | 1966-2001 | -198             | -5.5                |                        |
|                 |                   | 11             | Kangwure*                   | 28°28′       | 85°49′        | 1.9                     | 3.1         | NE          | Central Himalayas   | 1976-2007 | -294             | -9.2                |                        |
|                 |                   | 12             | Dasuopu*                    | 28°25′       | 85°41′        | 43.98                   | 14.3        | NE          | Central Himalayas   | 1968-2007 | -166             | -4.1                |                        |
|                 |                   | 13             | Qiangyong*                  | 28°51′       | 90°13′        | 7.98                    | 5.5         | N           | Central Himalayas   | 1975-2001 | -66              | -2.4                |                        |
|                 |                   | 14             | Rikha Samba <sup>73</sup>   | 28°50′       | 83°31′        | 4.62                    | -           | -           | Nepal Himalayas     | 1974-1994 | -200             | -10                 |                        |
|                 |                   | 15             | AX010 <sup>74</sup>         | 27°42′       | 86°34′        | 0.38                    | 1.7         | E/SE        | Nepal Himalayas     | 1978-1999 | -150             | -6.9                |                        |

|    |                |    |                                      |        |        |      |       |    |                                                                                               |           |       |       |       |
|----|----------------|----|--------------------------------------|--------|--------|------|-------|----|-----------------------------------------------------------------------------------------------|-----------|-------|-------|-------|
|    |                | 16 | Yala <sup>75</sup>                   | 28°14' | 85°37' | 1.88 | -     | -  | Nepal Himalayas                                                                               | 1987-1996 | -86   | -3.9  |       |
| IV | West Himalayas | 17 | Dokriani <sup>76</sup>               | 30°50' | 78°50' | 7    | 5.5   | W  | Garhwal Himalayas                                                                             | 1962-1995 | -550  | -16.6 | -16.6 |
|    |                | 18 | Pindari <sup>77</sup>                | 30°15' | 80°02' | -    | 5     | SW | Kumaun Himalayas                                                                              | 1958-2007 | -323  | -6.5  |       |
|    |                | 19 | Samudra Tapu <sup>78</sup>           | 32°30' | 77°30' | 73   | 17.7  | E  | Himachal Pradesh                                                                              | 1962-2000 | -741  | -19.5 |       |
|    |                | 20 | Chhota Shigri <sup>78</sup>          | 32°10' | 77°31' | 15.7 | 9     | N  | Himachal Pradesh                                                                              | 1963-2003 | -995  | -23.7 |       |
|    |                | 21 | Naimona'nyi*                         | 30°27' | 81°20' | 7.8  | 7.7   | N  | West Himalayas                                                                                | 1976-2006 | -155  | -5    |       |
|    |                | 22 | Milam <sup>79</sup>                  | 30°26' | 80°03' | 37   | 16.7  | SE | Kumaon Himalayas                                                                              | 1954-2003 | -1328 | -26.6 |       |
|    |                | 23 | Shaune Garang <sup>80</sup>          | 30°50' | 78°46' | 5.6  | 6.1   | N  | Garhwal Himalayas                                                                             | 1962-1999 | -1500 | -40.5 |       |
|    |                | 24 | Tipra Bank <sup>81</sup>             | 30°52' | 78°52' | 7.4  | -     | -  | Garhwal Himalayas                                                                             | 1962-2008 | -535  | -13.4 |       |
|    |                | 25 | Dunagiri <sup>81</sup>               | 30°54' | 78°51' | 2.56 | -     | -  | Garhwal Himalayas                                                                             | 1992-1997 | -15   | -3    |       |
|    |                | 26 | Satopanth <sup>81</sup>              | 30°56' | 78°53' | 12   | -     | -  | Garhwal Himalayas                                                                             | 1962-2005 | -1157 | -26.9 |       |
|    |                | 27 | Chorabari <sup>81</sup>              | 30°56' | 78°53' | 6.9  | -     | -  | Garhwal Himalayas                                                                             | 1962-2007 | -237  | -5.2  |       |
|    |                | 28 | No.13 Glacier <sup>82</sup>          | 33°39' | 76°21' | -    | 14.7  | -  | Between Nun Kun Massif and Zaskar Massif in Greater Himalaya Range in Zaskar, southern ladakh | 1975-2003 | 24    | 0.8   |       |
|    |                | 29 | Drang Drung <sup>82</sup><br>(No.11) | 33°47' | 76°19' | -    | 23.5  | -  |                                                                                               | 1975-2003 | -224  | -7.7  |       |
|    |                | 30 | No.10 Glacier <sup>82</sup>          | 33°50' | 76°18' | -    | 9.99  | -  |                                                                                               | 1975-2003 | -1786 | -61.6 |       |
|    |                | 31 | No.9 Glacier <sup>82</sup>           | 33°55' | 76°12' | -    | 14.45 | -  |                                                                                               | 1975-2003 | -813  | -28   |       |

|   |               |    |                                |        |        |        |      |       |                             |           |       |        |      |
|---|---------------|----|--------------------------------|--------|--------|--------|------|-------|-----------------------------|-----------|-------|--------|------|
|   |               | 32 | No.8 Glacier <sup>82</sup>     | 33°46' | 76°07' | -      | 6.98 | -     |                             | 1975-2003 | -16   | -0.6   |      |
|   |               | 33 | No.7 Glacier <sup>82</sup>     | 33°46' | 76°08' | -      | 7.5  | -     |                             | 1975-2003 | -229  | -7.9   |      |
|   |               | 34 | No.4 Glacier <sup>82</sup>     | 33°55' | 76°17' | -      | 6.6  | -     |                             | 1975-2003 | -745  | -25.7  |      |
|   |               | 35 | Parkachik (No.2) <sup>82</sup> | 33°53' | 76°10' | -      | 12.9 | -     |                             | 1979-2004 | 91    | 3.6    |      |
|   |               | 36 | Gangotri <sup>83</sup>         | 30°50' | 79°10' | 37.8   | 8.1  | SE    | Garhwal Himalayas           | 1971-2004 | -565  | -17.15 |      |
| V | Pamir regions | 37 | Maztag Ata*                    | 38°14' | 75°03' | 1      | 1.8  | W     | Maztag Ata                  | 2002-2010 | -13.6 | -1.7   | -0.9 |
|   |               | 38 | Baltoro <sup>84</sup>          | 35°50' | 76°30' | 1500   | 60   | -     | Karakoram                   | 1985-2004 | 32    | 1.6    |      |
|   |               | 39 | Raikot <sup>85</sup>           | 35°15' | 74°55' | 39     | 15   | -     | Nanga Parbat region         | 1954-2007 | 178   | 3.3    |      |
|   |               | 40 | Siachen <sup>86</sup>          | 35°30' | 77°00' | 987.1  | 70   | NW-SE | Karakorum Mts               | 1958-2005 | 0     | 0      |      |
|   |               | 41 | 5Y654D42 <sup>87</sup>         | 35°53' | 76°13' | 97.8   | 29.4 | NE    | Muztag Ata and Konggur Mts. | 1976-2000 | -478  | -19.1  |      |
|   |               | 42 | 5Y654D48 <sup>87</sup>         | 35°58' | 76°18' | 10.2   | 6.1  | NE    |                             | 1976-2000 | 2050  | 82     |      |
|   |               | 43 | 5Y654D53 <sup>87</sup>         | 36°09' | 76°01' | 158.11 | 42   | NE/E  |                             | 1968-2000 | 0     | 0      |      |
|   |               | 44 | 5Y654D77 <sup>87</sup>         | 36°07' | 76°18' | 8.79   | 5.3  | NE    |                             | 1968-2000 | 910   | 27.6   |      |
|   |               | 45 | 5Y654D78 <sup>87</sup>         | 36°07' | 76°18' | 1.5    | 2.8  | NE    |                             | 1968-2000 | 140   | 4.3    |      |
|   |               | 46 | 5Y654D97 <sup>87</sup>         | 36°11' | 76°08' | 15.79  | 10.7 | NE    |                             | 1968-2000 | 1998  | 60.5   |      |
|   |               | 47 | 5Y654C81 <sup>87</sup>         | 35°34' | 77°25' | 32.6   | 10   | NE    |                             | 1976-2000 | 0     | 0      |      |
|   |               | 48 | 5Y654C92 <sup>87</sup>         | 35°34' | 77°20' | 42.14  | 14.5 | N/NW  |                             | 1976-2000 | 0     | 0      |      |

|    |                         |        |        |        |      |       |               |       |       |
|----|-------------------------|--------|--------|--------|------|-------|---------------|-------|-------|
| 49 | 5Y654C116 <sup>87</sup> | 35°34' | 77°13' | 105.6  | 20.8 | N/NW  | 1976-200<br>0 | 0     | 0     |
| 50 | 5Y654C128 <sup>87</sup> | 35°37' | 76°06' | 124.5  | 28   | NE/NW | 1976-200<br>0 | 0     | 0     |
| 51 | 5Y654C145 <sup>87</sup> | 35°39' | 76°55' | 83.5   | 27.8 | NW    | 1976-200<br>0 | 0     | 0     |
| 52 | 5Y654C163 <sup>87</sup> | 35°49' | 76°38' | 119.8  | 26   | NE    | 1976-200<br>0 | 0     | 0     |
| 53 | 5Y653K72 <sup>87</sup>  | 35°31' | 77°25' | 70.7   | 20.7 | SE/NE | 1976-200<br>0 | 0     | 0     |
| 54 | 5Y653Q185 <sup>87</sup> | 36°04' | 76°48' | 2.45   | 4.4  | SE    | 1976-200<br>0 | -278  | -11.1 |
| 55 | 5Y663E14 <sup>87</sup>  | 38°15' | 75°06' | 14.6   | 8.6  | W/NW  | 1963-200<br>1 | 1758  | -45   |
| 56 | 5Y663E1 <sup>87</sup>   | 38°19' | 75°07' | 12.12  | 8.6  | N/W   | 1963-200<br>1 | -758  | -19.4 |
| 57 | 5Y663E8 <sup>87</sup>   | 38°18' | 75°05' | 8.91   | 9.4  | W     | 1963-200<br>1 | 437   | 11.2  |
| 58 | 5Y663D87 <sup>87</sup>  | 38°14' | 75°10' | 86.5   | 20.7 | E/NE  | 1963-200<br>1 | -226  | -5.8  |
| 59 | 5Y663B7 <sup>87</sup>   | 38°26' | 75°18' | -      | 6.5  | -     | 1963-200<br>1 | -669  | -17   |
| 60 | 5Y662D35 <sup>87</sup>  | 38°32' | 75°19' | 103.17 | 21   | SE/E  | 1964-200<br>1 | -1832 | -48   |
| 61 | 5Y656I27 <sup>87</sup>  | 38°12' | 75°12' | 7.41   | 6.5  | SW    | 1976-200<br>1 | 940   | 37    |
| 62 | 5Y656I22 <sup>87</sup>  | 38°12' | 75°12' | 1.98   | 2.1  | SW    | 1976-200<br>1 | 1410  | 56.4  |
| 63 | 5Y663D24 <sup>87</sup>  | 38°22' | 75°21' | 5.91   | 6    | SW    | 1963-200<br>1 | -514  | -13   |
| 64 | 5Y663D36 <sup>87</sup>  | 38°15' | 75°27' | 11.08  | 7    | NE/NW | 1963-200<br>1 | 1130  | 29    |
| 65 | 5Y663B25 <sup>87</sup>  | 38°37' | 75°17' | 128.15 | 20.3 | N     | 1963-200<br>1 | 0     | 0     |
| 66 | 5Y641F49 <sup>88</sup>  | 35°25' | 81°24' | 42.33  | 13.1 | NE    | 1970-200<br>1 | 141   | 4.4   |
| 67 | 5Y641F70 <sup>88</sup>  | 35°27' | 81°16' | 30.09  | 14.2 | NE    | 1970-200<br>1 | -790  | -24.7 |

Karakorum Mts

West Kunlun Mts



|     |          |    |                                     |        |        |        |      |       |               |       |       |      |
|-----|----------|----|-------------------------------------|--------|--------|--------|------|-------|---------------|-------|-------|------|
|     |          | 68 | 5Y641F73 <sup>88</sup>              | 35°29' | 81°41' | 23.5   | 14.9 | N/NE  | 1970-200<br>1 | 446   | 13.9  |      |
|     |          | 69 | 5Y641H67 <sup>88</sup>              | 35°33' | 80°35' | 41.7   | 15.1 | N/NW  | 1970-200<br>1 | -1431 | -44.7 |      |
|     |          | 70 | 5Y641F46 <sup>88</sup>              | 35°23' | 81°31' | 92.8   | 18.5 | NE/N  | 1970-200<br>1 | -616  | -19.3 |      |
|     |          | 71 | 5Y641H74 <sup>88</sup>              | 35°33' | 80°29' | 131.8  | 18.5 | NE    | 1970-200<br>1 | -511  | -16   |      |
|     |          | 72 | 5Y641G38 <sup>88</sup>              | 35°30' | 81°52' | 90.8   | 19   | N     | 1970-200<br>1 | -903  | -28.2 |      |
|     |          | 73 | 5Y641F98 <sup>88</sup>              | 35°30' | 81°07' | 64.27  | 20   | NW    | 1970-200<br>1 | -1176 | -36.8 |      |
|     |          | 74 | 5Y641G55 <sup>88</sup><br>(Kunlun)  | 35°26' | 80°47' | 200    | 23.6 | NE    | 1970-200<br>1 | 875   | 27.3  |      |
|     |          | 75 | 5Y641F85 <sup>88</sup>              | 35°28' | 81°12' | 84.3   | 26.1 | NE/N  | 1970-200<br>1 | -1146 | -35.8 |      |
|     |          | 76 | 5Y641F63 <sup>88</sup><br>(Yulong)  | 35°24' | 81°18' | 139.07 | 30.9 | NE/NW | 1970-200<br>1 | 522   | 16.3  |      |
|     |          | 77 | 5Y641G23 <sup>88</sup><br>(Duofeng) | 35°25' | 80°58' | 251.7  | 31   | NE    | 1970-200<br>1 | -883  | -27.6 |      |
| VI  | Tanggula | 78 | Xiao<br>Dongkemadi*                 | 33°10' | 92°08' | 1.8    | 2.8  | S/SW  | 1992-200<br>2 | -38   | -3.4  | -2   |
|     |          | 79 | Malan*                              | 35°50' | 90°47' | 37.8   | 8.1  | SE    | 1970-200<br>0 | -31   | -1    |      |
|     |          | 80 | Purogangri*                         | 33°57' | 89°06' | 18.5   | 9.1  | SW    | 1974-200<br>0 | -46   | -1.7  |      |
| VII | Qilian   | 81 | Laohu No.12 <sup>89</sup>           | 39°27' | 96°32' | 21.9   | 10.1 | N/NW  | 1977-200<br>5 | -157  | -5.4  | -4.2 |
|     |          | 82 | Qiyi*                               | 39°15' | 97°45' | 2.8    | 3.8  | N     | 1970-200<br>8 | -114  | -3    |      |

263  
264

**Supplementary Table S5** Detailed information on the glaciers for recent mass balance measurement in the TP and surroundings

| Region | Glacier number | Glaciers                    | Latitude (N) | Longitude (E) | Area (km <sup>2</sup> ) | Maximum elevation (m a.s.l.) | Minimum elevation (m a.s.l.) | Length (km) | Orientation | Locations                |
|--------|----------------|-----------------------------|--------------|---------------|-------------------------|------------------------------|------------------------------|-------------|-------------|--------------------------|
| I      | 1              | Parlung No.10               | 29°17′       | 96°54′        | 2.1                     | 5625                         | 4910                         | 3.5         | NE          | Southeast TP             |
|        | 2              | Parlung No.12               | 29°18′       | 96°54′        | 0.2                     | 5265                         | 5130                         | 0.6         | NE          | Southeast TP             |
|        | 3              | Parlung No.94               | 29°23′       | 96°59′        | 2.5                     | 5635                         | 5000                         | 2.9         | NW          | Southeast TP             |
|        | 4              | Parlung No.390              | 29°21′       | 97°01′        | 0.5                     | 5460                         | 5160                         | 1.2         | SE          | Southeast TP             |
| II     | 5              | Gurenhekou                  | 30°11′       | 90°28′        | 1.4                     | 6040                         | 5525                         | 2.9         | SE          | Nyainqentanglha Mountain |
|        | 6              | Zhongxi                     | 30°52′       | 91°27′        | 1.6                     | 6210                         | 5376                         | 2.6         | N           | Nyainqentanglha Mountain |
|        | 7              | Kangwure                    | 28°28′       | 85°49′        | 1.9                     | 6060                         | 5690                         | 3.1         | NE          | Central Himalayas        |
| III    | 8              | AX010 <sup>90</sup>         | 27°42′       | 86°34′        | 0.4                     | 5302                         | 4968                         | 1.7         | E/SE        | Central Himalayas        |
|        | 9              | Yala <sup>90</sup>          | 28°14′       | 85°37′        | 1.9                     | 5642                         | 5086                         | 1.5         | SW          | Central Himalayas        |
|        | 10             | Naimona'nyi                 | 30°27′       | 81°20′        | 7.8                     | 7520                         | 5465                         | 7.7         | N           | West Himalayas           |
| IV     | 11             | Hamtah <sup>91</sup>        | 32°21′       | 81°22′        | -                       | -                            | -                            | -           | -           | West Himalayas           |
|        | 12             | Chhota Shigri <sup>92</sup> | 32°12′       | 81°30′        | 15.7                    | 6263                         | 4050                         | 9           | N           | West Himalayas           |
| V      | 13             | Muztag Ata                  | 38°14′       | 75°03′        | 1                       | 5940                         | 5235                         | 1.8         | W           | West Kunlun Mountain     |
| VI     | 14             | Xiaodongkemadi              | 33°10′       | 92°08′        | 1.8                     | 5926                         | 5380                         | 2.8         | S/SW        | Tanggula Mountain        |
| VII    | 15             | Qiyi                        | 39°15′       | 97°45′        | 2.8                     | 5088                         | 4295                         | 3.8         | N           | Qilian Mountain          |

265  
266

267 **Supplementary Table S6** Recent annual mass balances in different regions in the TP.

| Regions | Glaciers                    | 2002/03 | 2003/04 | 2004/05 | 2005/06 | 2006/07 | 2007/08 | 2008/09 | 2009/10 | Average | Regional average |
|---------|-----------------------------|---------|---------|---------|---------|---------|---------|---------|---------|---------|------------------|
| I       | Parlung No.10               | -       | -       | -       | -675    | -283    | -593    | -1575   | -       | -781    | -1105            |
|         | Parlung No.12               | -       | -       | -       | -1449   | -1112   | -1410   | -2476   | -2046   | -1698   |                  |
|         | Parlung No.94               | -       | -       | -       | -913    | -254    | -1079   | -2018   | -347    | -922    |                  |
|         | Parlung No.390              | -       | -       | -       | -       | -170    | -1250   | -1673   | -982    | -1019   |                  |
| II      | Gurenhekou                  | -       | -       | -       | -319    | -196    | 497     | -839    | -703    | -312    | -418             |
|         | Zhongxi                     | -       | -       | -       | -       | -       | 264     | -1045   | -789    | -523    |                  |
|         | Kangwure                    | -       | -       | -       | -1023   | -392    | -487    | -1092   | -300    | -660    |                  |
| III     | AX010 <sup>90*</sup>        |         |         |         | -810    |         |         |         | -       | -810    | -757             |
|         | Yala <sup>90*</sup>         |         |         |         | -800    |         |         |         | -       | -800    |                  |
| IV      | Naimona'nyi                 | -       | -       | -       | -658    |         | -718    | -472    | -276    | -556    | -908             |
|         | Hamtah <sup>91</sup>        | -       | -1857   | -1856   | -790    | -       | -       | -       | -       | -1501   |                  |
|         | Chhota Shigri <sup>92</sup> | -1400   | -1227   | 144     | -1400   | -980    | -930    | 130     | 330     | -667    |                  |
| V       | Muztag Ata                  | -       | -       | -       | -237    | 956     | 79      | 220     |         | 248     | 248              |
| VI      | Xiaodongkemadi              | -       | -       | -       | -917    | -591    | -80     | -91     | -1066   | -549    | -549             |
| VII     | Qiyi                        | -       | -       | -       | -955    | -513    | -105    | -74     | -648    | -459    | -459             |

268 \*The average mass balances AX010 (1999-2008) and Yala Glacier (1996-2009) were taken to represent the recent mass balance since 2002/03. The red color numbers for the Kangwure Glacier  
269 were reconstructed following the method in Section 3.2.

270 **Supplementary Table S7** Mass balance of Long-time series for the Qiyi, Xiaodongkemadi and  
 271 Kangwure Glaciers in the TP.

| Years | Qiyi | Xiaodongkemadi | Kangwure |
|-------|------|----------------|----------|
| 1975  | 35   | -              | -        |
| 1976  | 384  | -              | -        |
| 1977  | 350  | -              | -        |
| 1978  | -1   | -              | -        |
| 1979  | 241  | -              | -        |
| 1980  | 130  | -              | -        |
| 1981  | -51  | -              | -        |
| 1982  | 197  | -              | -        |
| 1983  | 292  | -              | -        |
| 1984  | 226  | -              | -        |
| 1985  | -31  | -              | -        |
| 1986  | -165 | -              | -        |
| 1987  | 38   | -              | -        |
| 1988  | -49  | -              | -        |
| 1989  | -205 | 525            | -        |
| 1990  | 183  | 45             | -        |
| 1991  | -405 | -180           | -        |
| 1992  | 132  | 375            | -250     |
| 1993  | 441  | 210            | -640     |
| 1994  | -285 | -510           | -484     |
| 1995  | -273 | -570           | -460     |
| 1996  | -615 | -495           | -308     |
| 1997  | -293 | 345            | -251     |
| 1998  | 46   | -690           | -507     |
| 1999  | -778 | -315           | -397     |
| 2000  | -612 | -90            | -229     |
| 2001  | -666 | -195           | -685     |
| 2002  | -810 | -583           | -496     |
| 2003  | -361 | 4              | -574     |
| 2004  | -634 | -153           | -479     |
| 2005  | -476 | -177           | -728     |
| 2006  | -955 | -917           | -1023    |
| 2007  | -513 | -591           | -392     |
| 2008  | -105 | -80            | -487     |
| 2009  | -74  | -91            | -1092    |
| 2010  | -648 | -1066          | -300     |

272 \* The red color numbers are the reconstructed mass balance.

273 **Supplementary Figures**

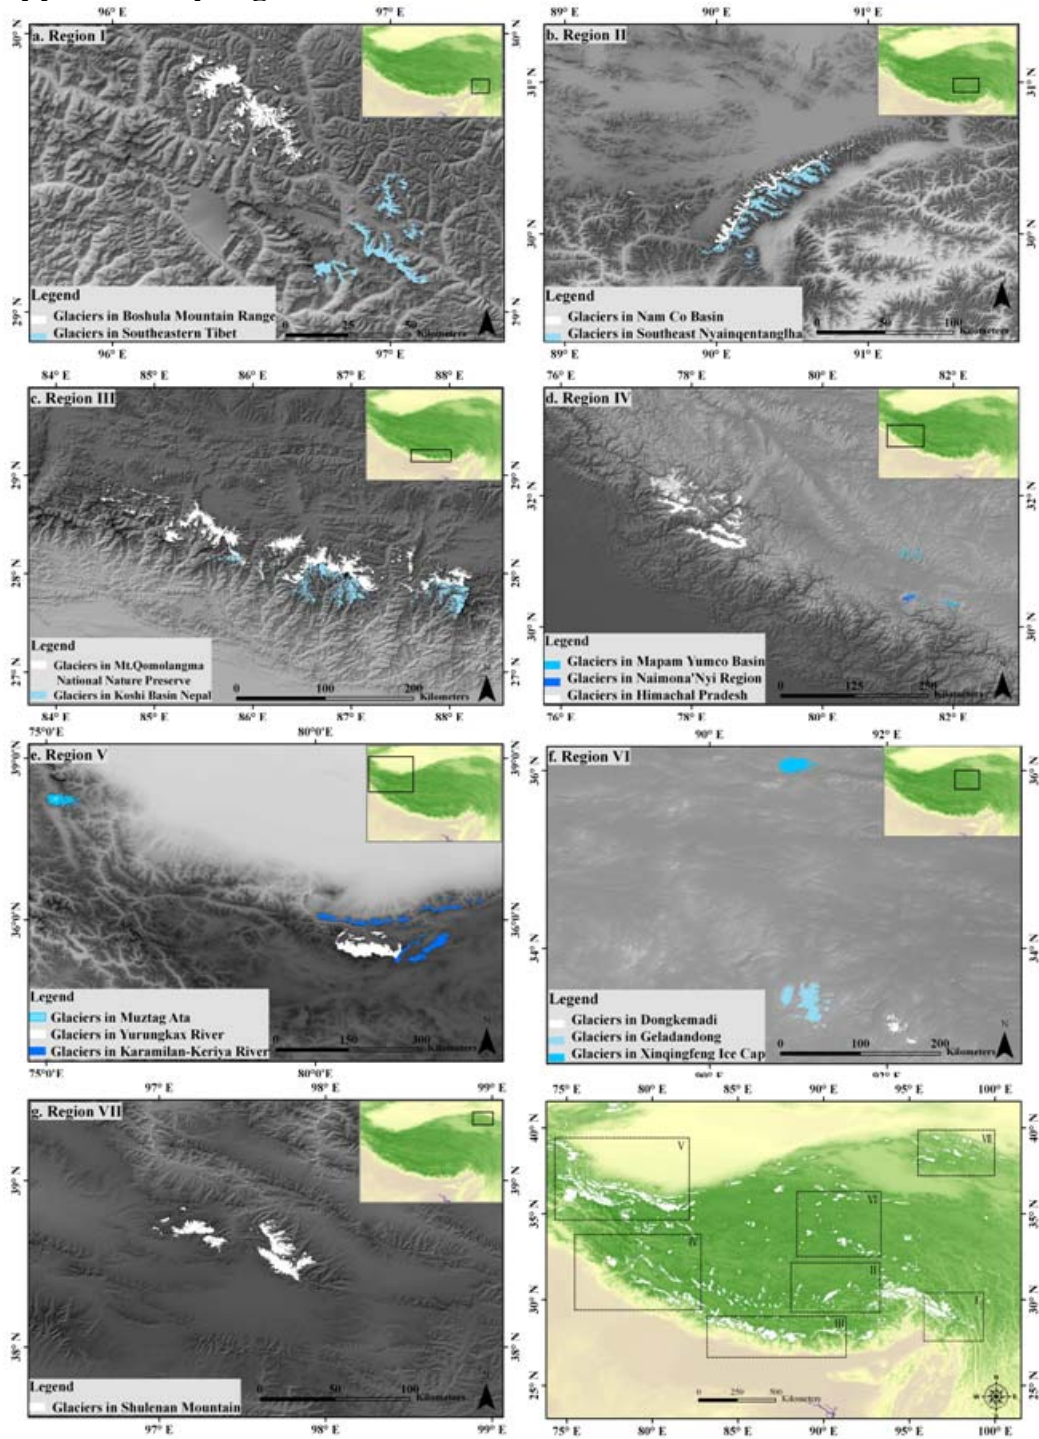

274  
275  
276

**Supplementary Figure S1.** The distribution of glaciers for analyzing area reduction studies in the seven regions.

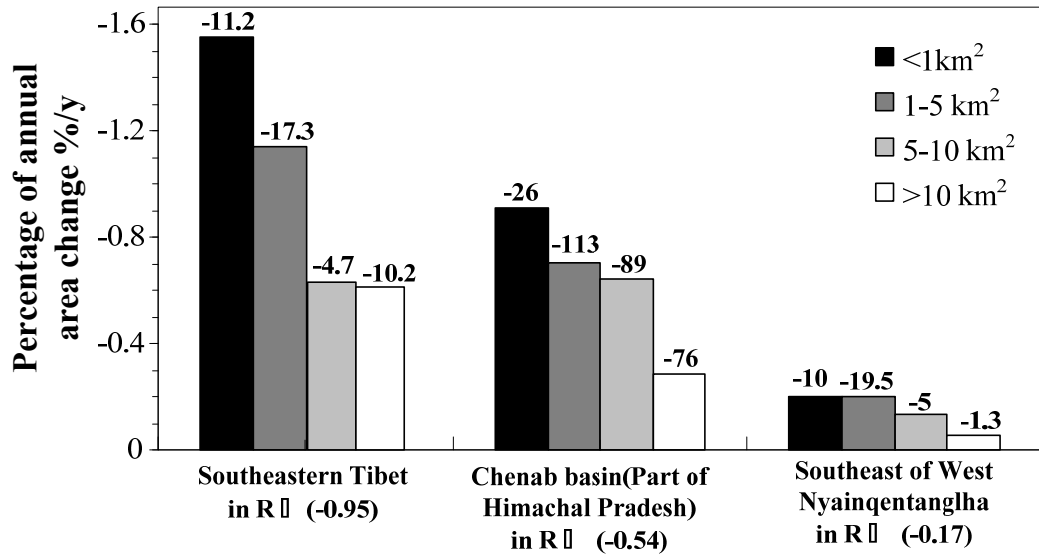

277  
278  
279  
280  
281  
282

**Supplementary Figure S2** Comparison of the change of glacier with different sizes in different regions. The absolute area changes (km<sup>2</sup>) are shown on top of each column. The number in the parentheses is the percentage of annual area change of this region.

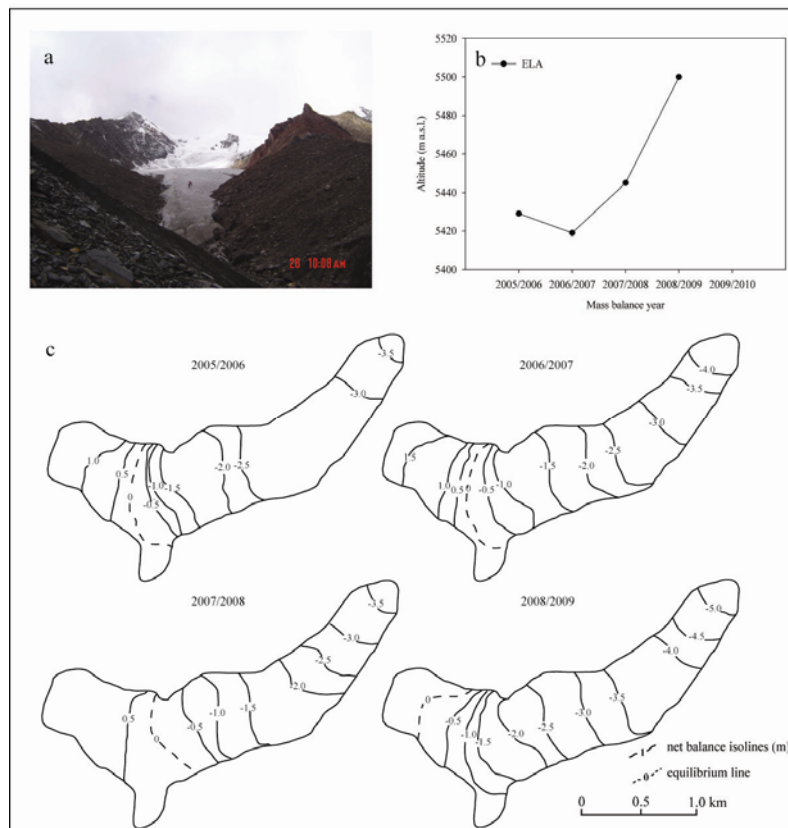

283  
284  
285  
286  
287  
288

**Supplementary Figure S3** The Parlung No. 10 Glacier. a) Photo of the Parlung No.10 Glacier, b) variation of ELAs and c) spatial mass balance distribution in past four balance years

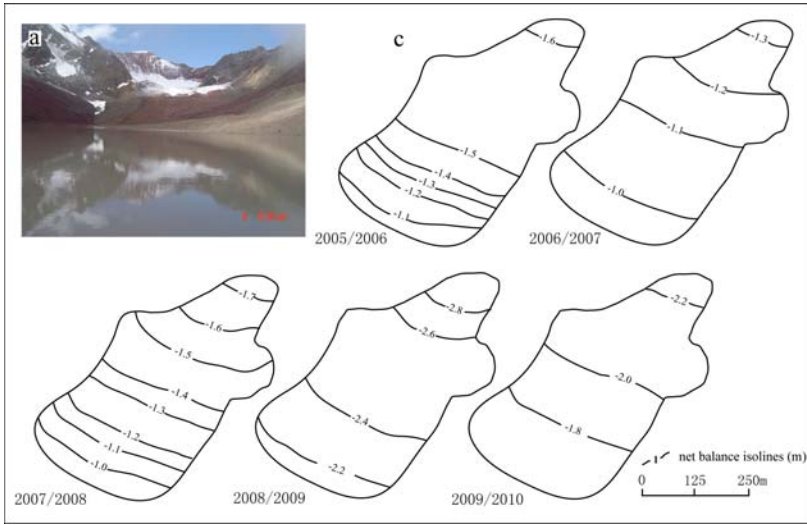

290  
291  
292  
293

**Supplementary Figure S4** The Parlung No. 12 Glacier. a) Photo of the Parlung No.12 Glacier, c) spatial mass balance distribution in past five balance years

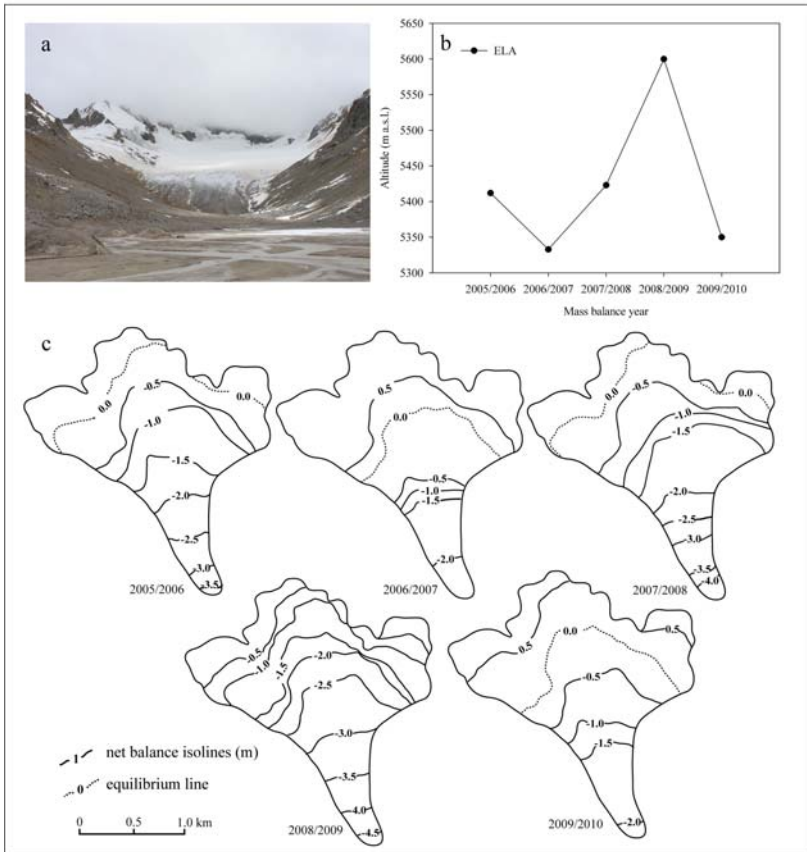

294  
295  
296

**Supplementary Figure S5** The Parlung No. 94 Glacier. a) Photo of the Parlung No.94 Glacier, b) variation of ELAs and c) spatial mass balance distribution in past five balance years

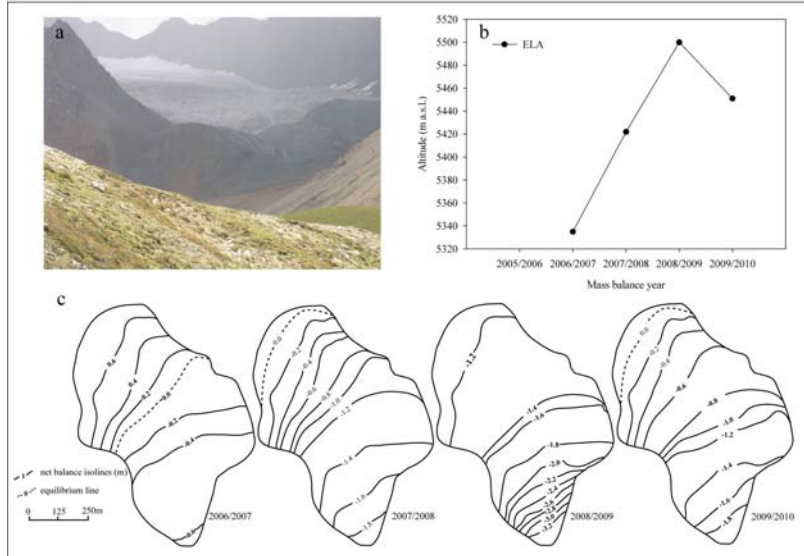

297  
 298 **Supplementary Figure S6** The Parlung No. 390 Glacier. a) Photo of the Parlung No.390 Glacier, b)  
 299 variation of ELAs and c) spatial mass balance distribution in past four balance years

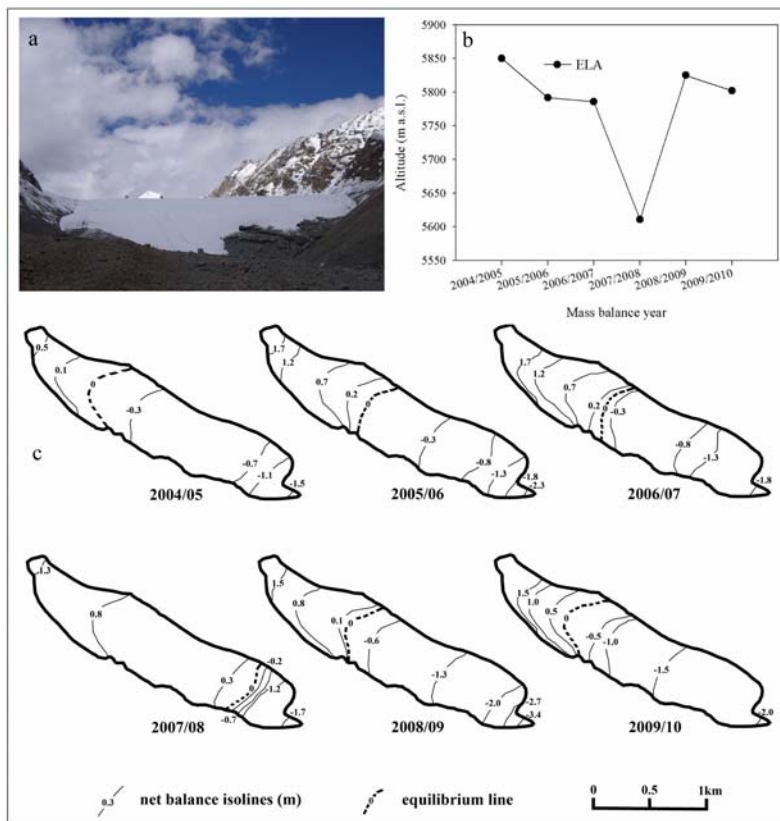

300  
 301 **Supplementary Figure S7** The Gurenhekou Glacier. a) Photo of the Gurenhekou Glacier, b)  
 302 variation of ELAs and c) spatial mass balance distribution in past six balance years



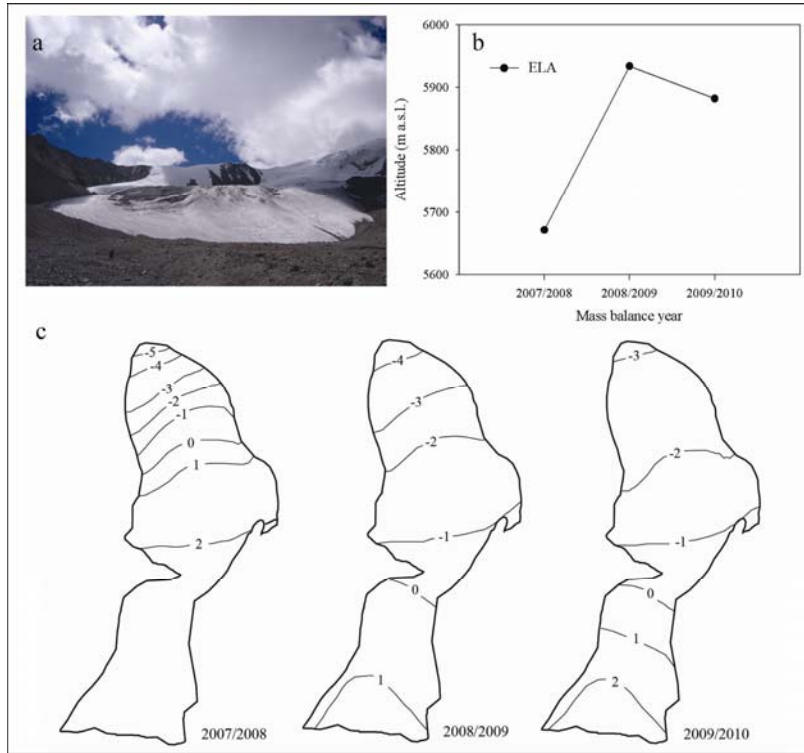

303  
 304 **Supplementary Figure S8** The Zhongxi Glacier. a) Photo of the Zhongxi Glacier, b) variation of  
 305 ELAs and c) spatial mass balance distribution in past three balance years

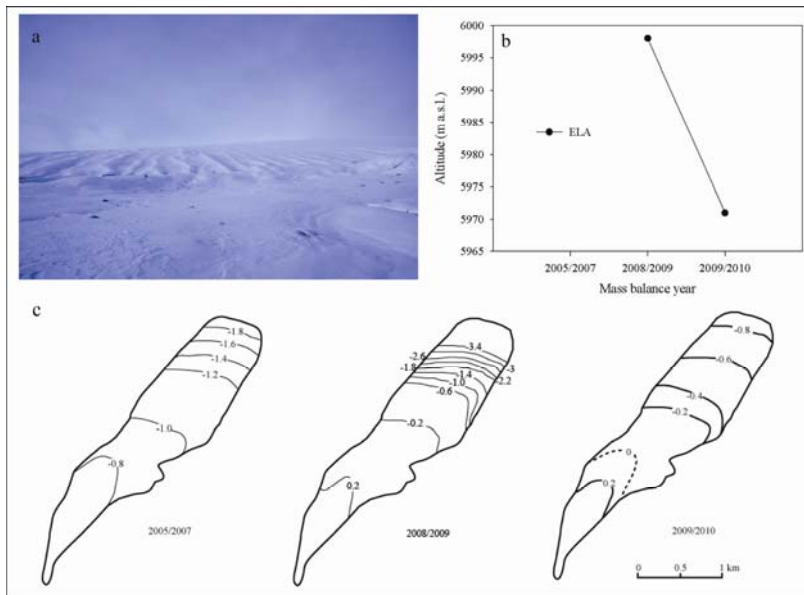

306  
 307 **Supplementary Figure S9** The Kangwure Glacier. a) Photo of the Kangwure Glacier, b) variation  
 308 of ELAs and c) spatial mass balance distribution in past three balance years  
 309

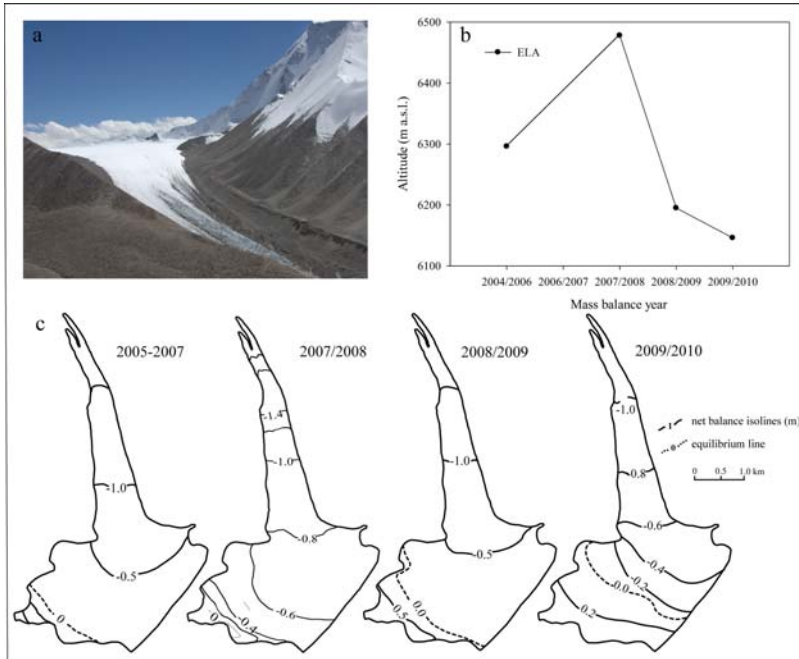

310  
311  
312  
313  
314

**Supplementary Figure S10** The Naimona'nyi Glacier. a) Photo of the Naimona'nyi Glacier, b) variation of ELAs and c) spatial mass balance distribution

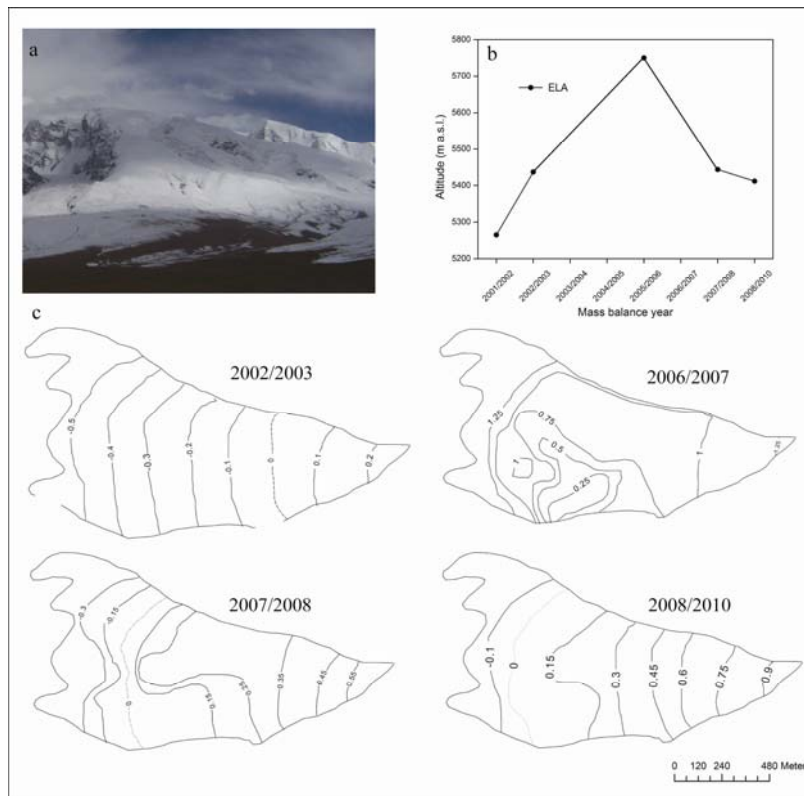

315  
316

**Supplementary Figure S11** The Muztag Ata Glacier. a) Photo of the Muztag Ata Glacier, b)

317 variation of ELAs and c) spatial mass balance distribution

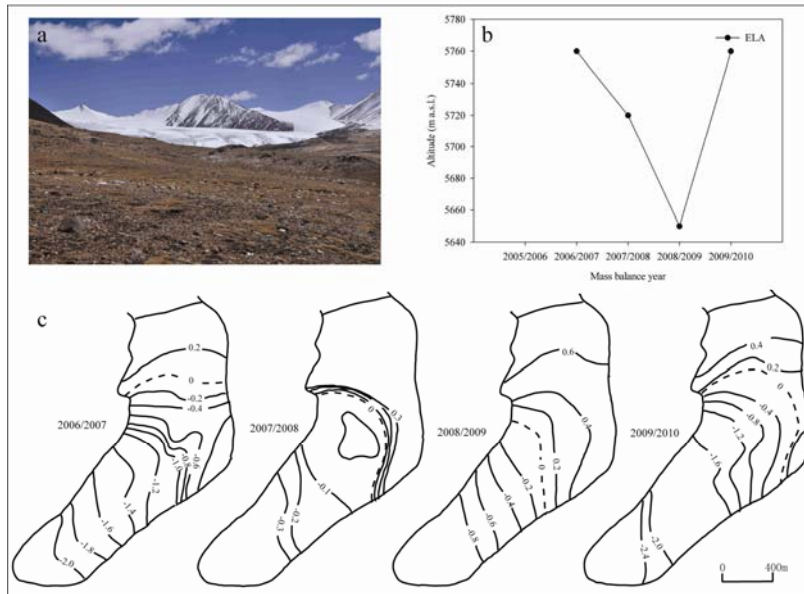

318

319 **Supplementary Figure S12** The Xiaodongkemadi Glacier. a) Photo of the Xiaodongkemadi

320 Glacier, b) variation of ELAs and c) spatial mass balance distribution in past four balance years

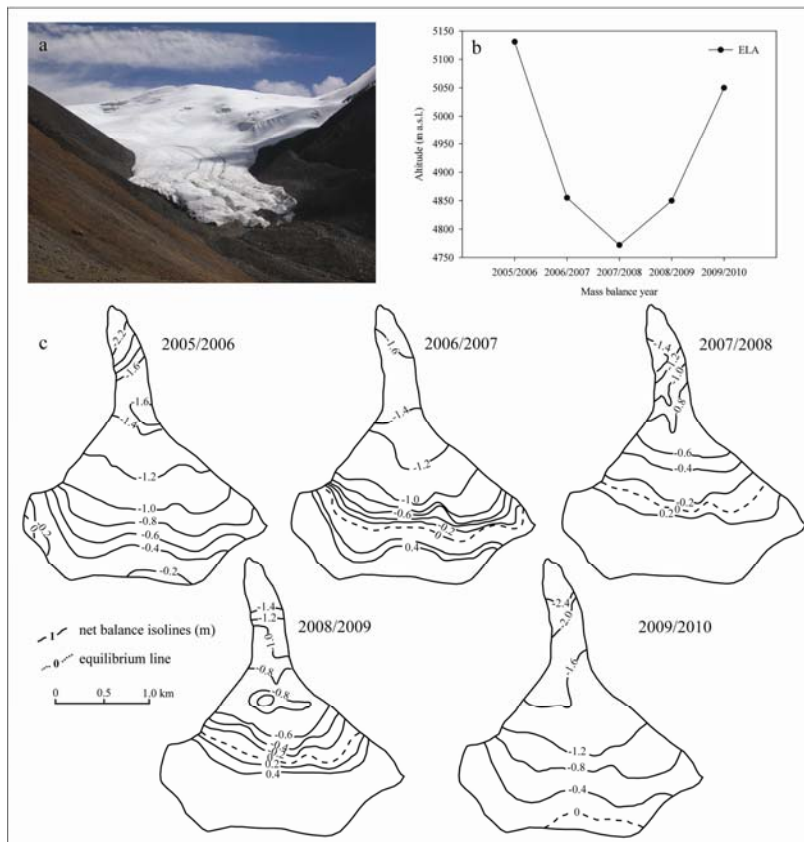

321

322 **Supplementary Figure S13** The Qiyi Glacier. a) Photo of the Qiyi Glacier, b) variation of ELAs

323 and c) spatial mass balance distribution in past four balance years

324

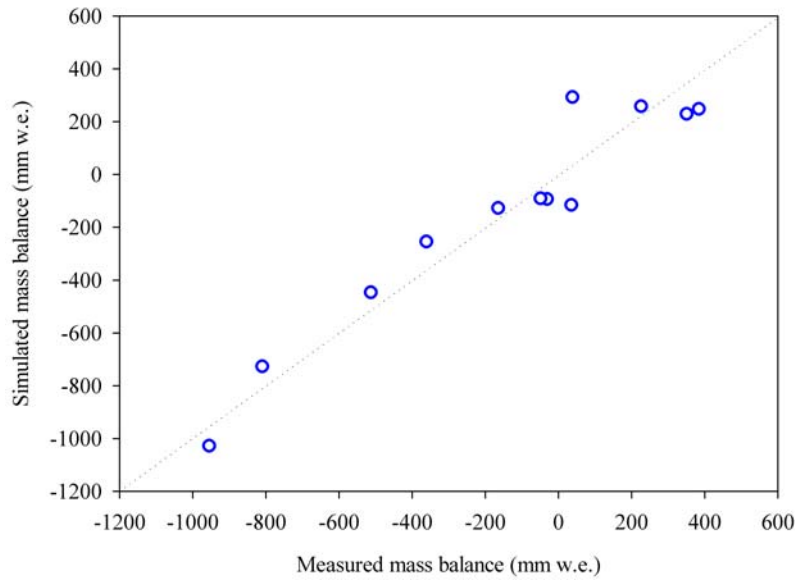

325  
 326 **Supplementary Figure S14** Comparison between measured and simulated mass balance for the  
 327 Qiyi Glacier.  
 328

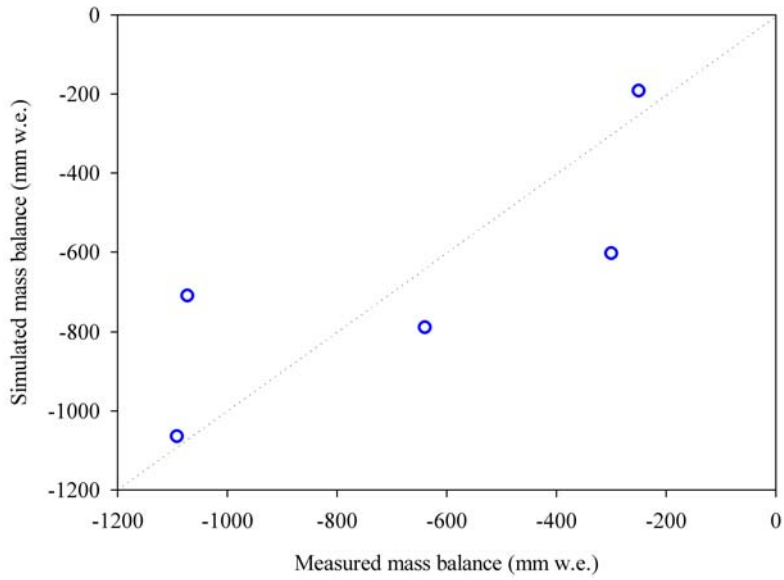

329  
 330 **Supplementary Figure S15** Comparison between measured and simulated mass balances for the  
 331 Kangwure Glacier.  
 332

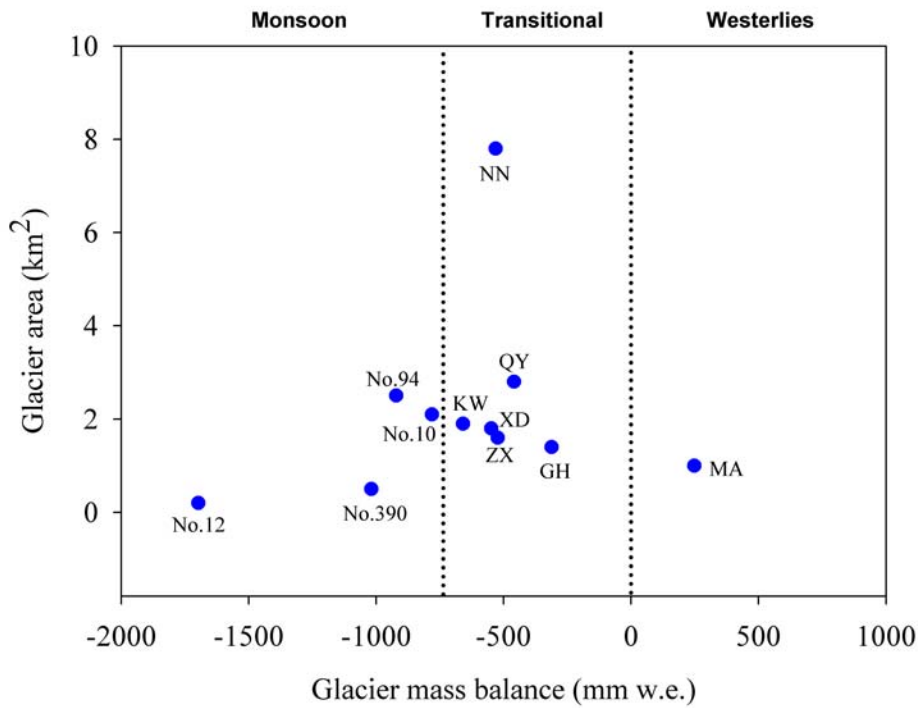

333  
334  
335  
336  
337  
338

**Supplementary Figure S16** Distinctive features of glacial mass balance under different climate dominances. (No. 10, 12, 94, 390-Parlung No. 10, 12, 94, 390; NN-Naimona'nyi; QY-Qiyi; KW-Kangwure; XD-Xiaodongkemadi; ZX-Zhongxi; GH-Gurenhekou; MA-Muztag Ata)

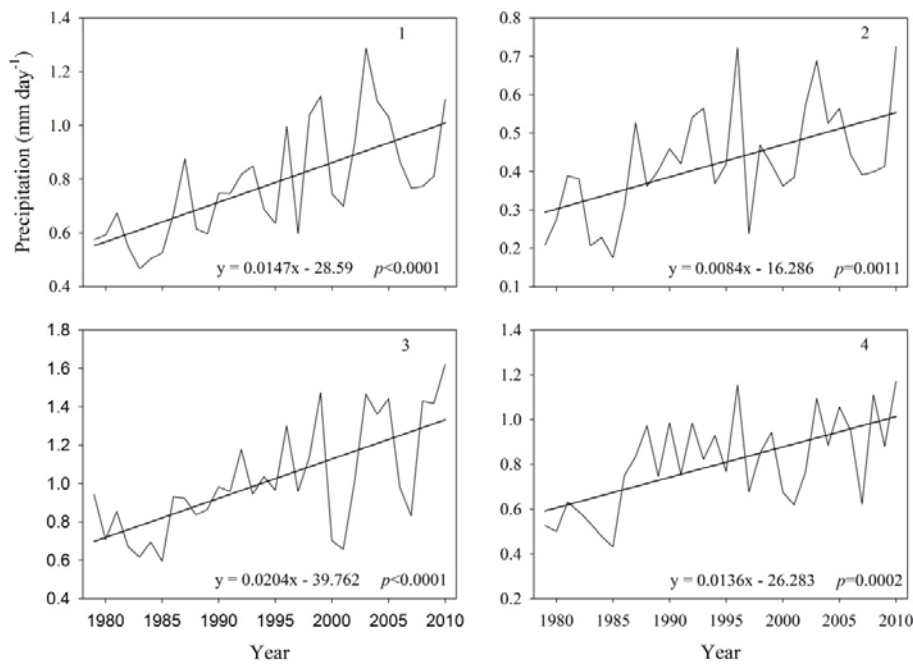

339  
340  
341  
342

**Supplementary Figure S17** The linear trends of GPCP precipitation (mm day<sup>-1</sup>) for 1979–2010 from the grids numbered as 1-4 in Figure S4g. All the positive trends are statistically significant at the 99% confidence level using the Mann-Kendall test.

343

344

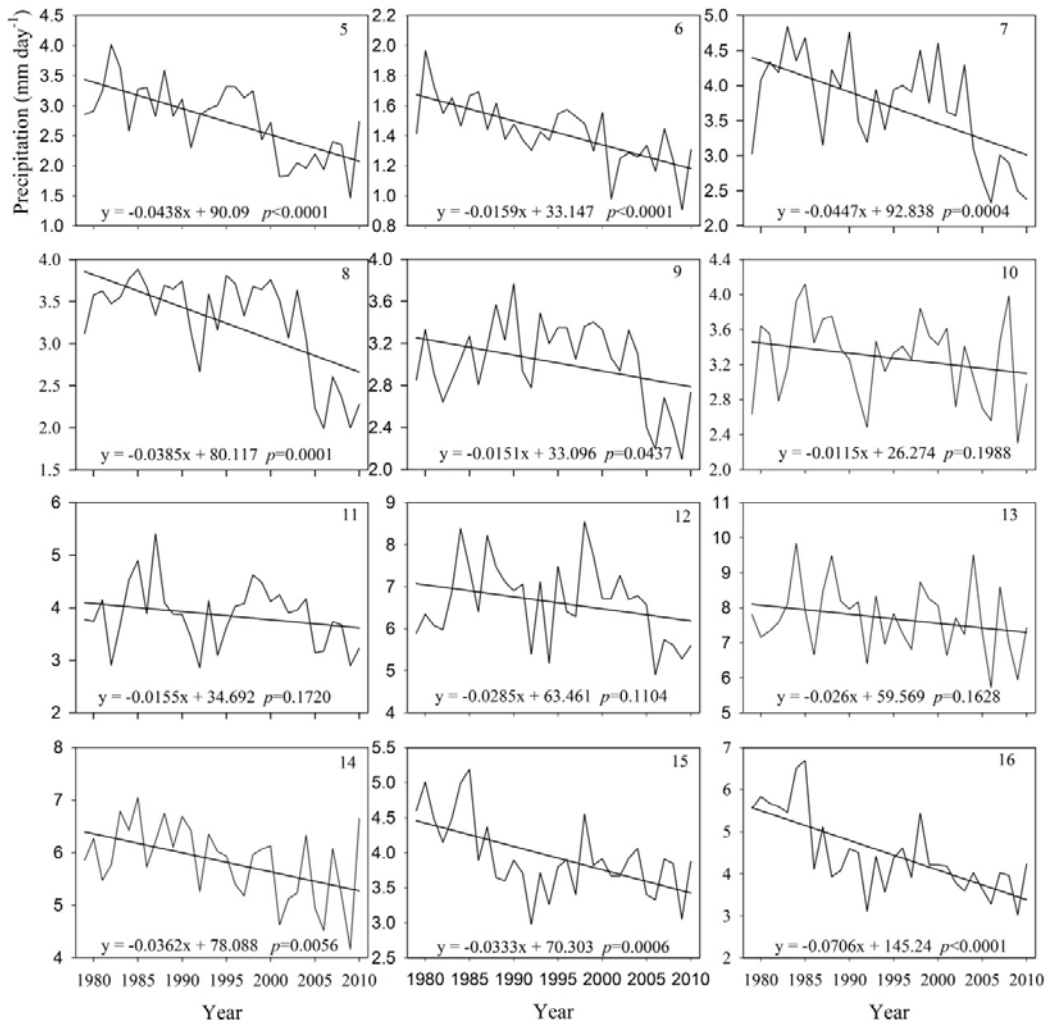

345

346

**Supplementary Figure S18** The linear trends of GPCP precipitation (mm day<sup>-1</sup>) for 1979–2010

347

from the grids numbered as 5-16 in Figure S4g. The native trends for No.5–8 and No.14–16 are

348

statistically significant at the 99% confidence level using the Mann-Kendall test.

349

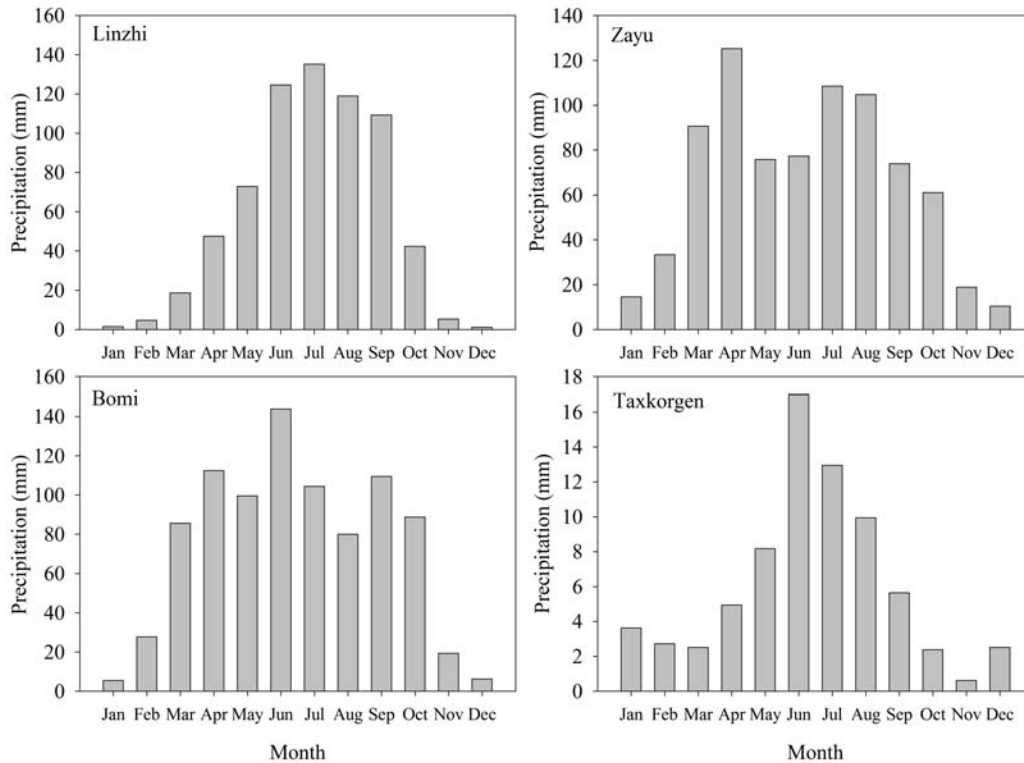

350  
 351 **Supplementary Figure S19** The monthly mean precipitation at the meteorological stations of  
 352 Linzhi, Zayu, Bomi and Taxkorgen during 1970-2009. The precipitation at all the four stations  
 353 shows a strong seasonality characterized by high precipitation in the summer and low precipitation  
 354 in the winter.

355

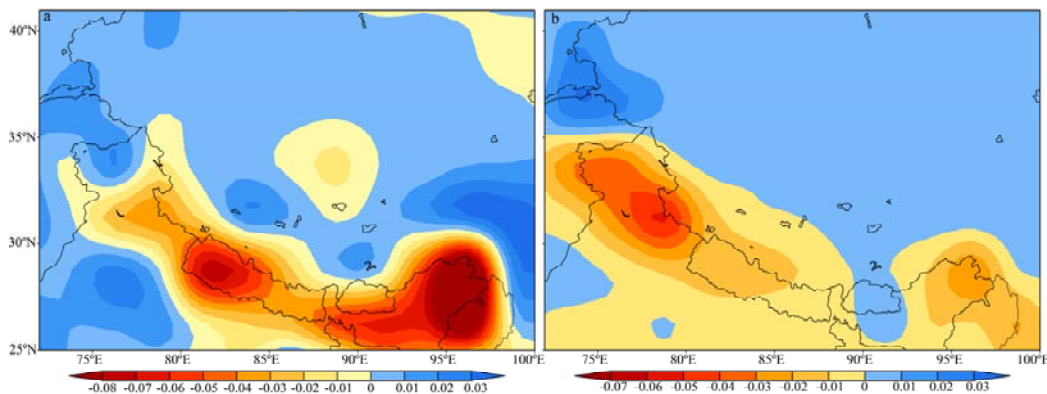

356  
 357 **Supplementary Figure S20** The spatial feature of GPCP precipitation ( $\text{mm day}^{-1}$ ) trend in the  
 358 summer (a) and winter (b) seasons in the TP and surroundings during 1979-2010. Similar to the  
 359 annual spatial trends in Figure 4a in the text, the summer and winter spatial trends demonstrate  
 360 decreasing precipitation in the eastern Himalayas and increasing precipitation in the eastern Pamir  
 361 regions, with more intensive decreasing in the summer in the Indian monsoon-dominated  
 362 Himalayas and more intensive increasing in the winter in the westerlies-dominated Pamir regions.

363  
 364

365 **Supplementary References**

366 (for references 1 to 30 see main text)

367

368 31. Shi, Y. *et al.* *Concise Glacier Inventory of China* (in Chinese) (Shanghai Popular Science  
369 Press, Shanghai, China, 2008).

370 32. Dyurgerov, M. B. *Glacier mass balance and regime: Data of measurements and analysis,*  
371 *INSTAAR Occas. Pap. 55*, edited by M. Meier and R. Armstrong, Inst. of Arct. and Alp. Res.,  
372 Boulder, Colo (2000).

373 33. Shi, Y. & Liu, S. Estimation on the response of glaciers in China to the global warming in the  
374 21st century. *Chin. Sci. Bull.* **45**, 668-672 (2000).

375 34. Yao, T. *et al.* Recent glacial retreat in High Asia in China and its impact on water resource in  
376 Northwest China. *Sci. China Ser. D* **47**(12), 1065-1075 (2004).

377 35. Yao, T. *et al.* Glacial distribution and mass balance in the Yarlung Zangbo River and its  
378 influence on lakes. *Chin. Sci. Bull.* **55**(20), 2072-2078 (2010).

379 36. Yang, W. *et al.* Characteristics of recent temperate glacier fluctuations in the Parlung Zangbo  
380 River basin, southeast Tibetan Plateau. *Chin. Sci. Bull.* **55**(20), 2097-2102 (2010).

381 37. Ma, L., Tian, L., Pu, J. & Wang, P. Recent area and ice volume change of Kangwure Glacier  
382 in the middle of Himalayas. *Chin. Sci. Bull.* **55**(20), 2088-2096 (2010).

383 38. Jiang, X., Wang, N., He, J., Wu, X. & Song, G. A distributed surface energy and mass balance  
384 model and its application to a mountain glacier in China. *Chin. Sci. Bull.* **55**(20), 2079-2087  
385 (2010).

386 39. Wang, N., He, J., Pu, J., Jiang, X. & Jing, Z. Variations in equilibrium line altitude of the Qiyi  
387 Glacier, Qilian Mountains, over the past 50 years. *Chin. Sci. Bull.* **55**(33), 3810-3817 (2010).

388 40. Yang, W. *et al.* Quick ice mass loss and abrupt retreat of the maritime glaciers in the Kangri  
389 Karpo Mountains, southeast Tibetan Plateau. *Chin. Sci. Bull.* **53**, 2547-2551(2008).

390 41. Xin, X., Yao, T., Ye, Q., Guo, L. & Yan, W. Study of the Fluctuations of Glaciers and Lakes  
391 around the Ranwu Lake of Southeast Tibetan Plateau using Remote Sensing. *J. Glaciol.*  
392 *Geocryol.* **31**(1), 19-26 (2009).

393 42. Li, Z., Yao, T., Ye, Q., Tian, L. & Wang, W. Glaciers in the upstream Manla Reservoir in the  
394 Nianchu River basin, Tibet: shrinkage and impact. *J. Glaciol. Geocryol.* **32**(4), 650-658  
395 (2010).

396 43. Pu, J., Yao, T., Wang, N., Su, Z. & Shen, Y. Fluctuations of the glaciers on the  
397 Qinghai-Tibetan Plateau during the past century. *J. Glaciol. Geocryol.* **26**(5), 517-522 (2004).

398 44. Ren, J. *et al.* Glacier variations and climate warming and drying in the central Himalayas.  
399 *Chin. Sci. Bull.* **49**, 65-69 (2004).

400 45. Qin, D. *Map of Glacial Resource in the Himalayas* (in Chinese) (Science Press, Beijing,  
401 China, 1999).

402 46. Liu, S., *et al.* Glacier Variations since the Early 20th Century in the Gangrigabu Range,



- 403 Southeast Tibetan Plateau. *J. Glaciol. Geocryol.* **27**, 55-63 (2005). (In Chinese)
- 404 47. Jin, R., Che, T., Li, X. & Wu, L. Glacier Variation in the Pumqu Basin Derived from Remote  
405 Sensing Data and GIS Technique. *J. Glaciol. Geocryol.* **26**, 261-266 (2004). (In Chinese)
- 406 48. Liu, C., Kang, E., Liu, S., Chen, J. & Liu, Z. Study on the glacier variation and its runoff  
407 responses in the arid region of Northwest China. *Sci. China Ser. D* **42**(supp), 64-71 (1999).
- 408 49. Su, Z. & Shi, Y. Response of monsoonal temperate glaciers in China to global warming since  
409 the Little Ice Age. *J. Glaciol. Geocryol.* **22**(3), 223-229 (2000).
- 410 50. Shi, Y. *et al.* Glaciers and related environments in China. Science Press, Beijing, 2008.
- 411 51. Yang, W., Yao, T., Xu, B. & Zhou, H. Influence of supraglacial debris on the summer ablation  
412 and mass balance in the 24K Glacier, southeastern Tibetan Plateau. *Geogr. Ann. Ser. A-Phys.*  
413 *Geogr.* **92**, 353-360 (2010).
- 414 52. Bolch, T., Pieczonka, T. & Benn, D. I. Multi-decadal mass loss of glaciers in the Everest area  
415 (Nepal Himalaya) derived from stereo imagery. *Cryosphere*, **5**, 349-358 (2011).
- 416 53. Fujita, K. & Ageta, Y. Effect of summer accumulation on glacier mass balance on the Tibetan  
417 Plateau revealed by mass-balance model. *J. Glaciol.* **46**, 244-252 (2000).
- 418 54. Kang, S. *et al.* Review of climate and cryospheric change in the Tibetan Plateau. *Environ.*  
419 *Res. Lett.* **5**, doi:10.1088/1748-9326/5/1/015101 (2010).
- 420 55. Andreassen, L. M., Paul, F., Kääb, A. & Hausberg, J. E. Landsat-derived glacier inventory for  
421 Jotunheimen, Norway, and deduced glacier changes since the 1930s. *Cryosphere*. **2**, 131-145  
422 (2008).
- 423 56. Paul, F., Kääb, A., Maisch, M., Kellenberger, T., & Haeberli, W., The new  
424 remote-sensing-derived Swiss glacier inventory: I. Methods. *Ann. Glaciol.* **34**,  
425 355-361(2002).
- 426 57. Bolch, T. & Kamp, U. Glacier mapping in high mountains using DEMs, Landsat and ASTER  
427 data. In Kaufmann, V. and W. Sulzer, eds. Proceedings of the 8th International Symposium on  
428 High Mountain Remote Sensing Cartography. Graz, Karl Franzens University, 13-24 (2006).  
429 (Grazer Schriften der Geographie und Raumforschung 41)
- 430 58. Bhambri, R., Bolch, T., Chaujar, R.K. & Kulshreshtha, S. C. Glacier changes in the Garhwal  
431 Himalaya, India, from 1968 to 2006 based on remote sensing. *J. Glaciol.* **57**(203), 543-556  
432 (2011).
- 433 59. Bolch, T. *et al.* A glacier inventory for the western Nyainqêntanglha Range and the Nam Co  
434 Basin, Tibet, and glacier changes 1976-2009. *Cryosphere* **4**, 419-433 (2010).
- 435 60. Shangguan, D. *et al.* Variation of glaciers in the Western Nyainqentanglha Range of Tibetan  
436 Plateau during 1970-2000. *J. Glaciol. Geocryol.* **30**(2), 204-210 (2008). (In Chinese)
- 437 61. Nie, Y., Zhang, Y., Liu, L. & Zhang, J. Monitoring glacier change based on remote sensing in  
438 the Mt. Qomolangma National Nature Preserve, 1976-2006. *Acta. Geogr. Sin.* **65**(1), 13-28  
439 (2010). (In Chinese)
- 440 62. Guo, L. Ye, Q., Yao, T., Chen, F. & Cheng, W. The glacial landforms and the changes of

- 441 glacier and lake area in the Mapam Yumco basin in Tibetan Plateau based on GIS. *J. Glaciol.*  
442 *Geocryol.* **29**(4), 517-524 (2007). (In Chinese)
- 443 63. Ye, Q., Chen, F., Stein, A. & Zhongz. Use of a multi-temporal grid method to analyze  
444 changes in glacier coverage in the Tibetan Plateau. *Prog. Nat. Sci.* **19**, 861-872 (2009).
- 445 64. Kulkarni, A. *et al.* Glacial retreat in Himalaya using Indian Remote Sensing satellite data.  
446 *Curr. Sci.* **92**(1), 69-74 (2007).
- 447 65. Cai, D. Ma, J., Nian, Y., Liu, S. & Shangguan D. The study of glacier change using remote  
448 sensing in Mt.Muztagta. *J. Lanzhou University (Natural Sciences)* **42**(1), 13-17 (2006). (In  
449 Chinese)
- 450 66. Shangguan, D., Liu, S., Ding, Y., Ding, L. & Li, G. Glacier changes at the head of Yurungkax  
451 River in the west Kunlun Mountains in the past 32 years. *Acta. Geogr. Sin.* **59**(6), 855-862  
452 (2004). (In Chinese)
- 453 67. Xu, J. Liu, S., Zhang, S. & Shangguan, D. Glaciers fluctuations in the Karamilan-Keriya  
454 River Watershed in the past 30 years. *J. Glaciol. Geocryol.* **28**, 312-318 (2006). (In Chinese)
- 455 68. Qiao, C. Remote sensing monitoring of glacier changes in Dongkemadi region of Tanggula  
456 Mountain. *J. Anhui Agri. Sci.* **38**(14), 7703-7705 (2010). (In Chinese)
- 457 69. Liu, S. *et al.* Variation of glaciers studied on the basis of RS and GIS-A reassessment of the  
458 changes of the Xinqingfeng and Malan ice caps in the northern Tibetan Plateau. *J. Glaciol.*  
459 *Geocryol.* **26**(3), 244-252 (2004). (In Chinese)
- 460 70. Liu, S. *et al.* Glacier change during the past century in the Gangrigabu mountains, southeast  
461 Qinghai-Xizang (Tibetan) Plateau, China. *Ann. Glaciol.* **43**, 187-193 (2006).
- 462 71. Kang, S. *et al.* Glacier retreating dramatically on the Mt. Nyainqentanglha during the last 40  
463 years. *J. Glaciol. Geocryol.* **29**, 869-873 (2007). (In Chinese)
- 464 72. Ren, J., Jing, Z., Pu, J. & Qin, X. Glacier variations and climate change in the central  
465 Himalaya over the past few decades. *Ann. Glaciol.* **43**, 218-222 (2006).
- 466 73. Fujita, K., Nakawo, M., Fujii, Y. & Paudyal, P. Change in glaciers in Hidden Valley, Mukut  
467 Himal, Nepal Himalayas, from 1974 to 1994. *J. Glaciol.* **43**, 583-588 (1997).
- 468 74. Fujita, K., Kadota, T., Rana, B. Kayastha, R. B. & Agata, Y. Shrinkage of Glacier AX010 in  
469 Shorong region, Nepal Himalayas in the 1990s. *Bull. Glaciol. Res.* **18**, 51-54 (2001).
- 470 75. Fujita, K., Takeuchi, N. & Seko, K. Glaciological observations of Yala Glacier in Langtang  
471 Valley, Nepal Himalayas, 1994 and 1996. *Bull. Glaciol. Res.* **16**, 75-81 (1998).
- 472 76. Dobhal, D., Gergan, J.T. & Thayyen, R.J. Recession and morphogeometrical changes of  
473 Dokriani glacier (1962-1995) Garhwal Himalaya, India. *Curr. Sci.* **86**, 692-696 (2004).
- 474 77. Rameshwar, B., Agarwal, K. K., Sheikh, N. A. & Purnima, S. Is the recessional pattern of  
475 Himalayan glaciers suggestive of anthropogenically induced global warming? *Arab. J.*  
476 *Geosci.* **4**, 1087-1093 (2011).
- 477 78. Kulkarni, A. V., Dhar, S., Rathore, B. P., Babu, G. R. K. & Kalia, R. Recession of Samudra  
478 Tapu glacier, Chandra River basin, Himachal Pradesh. *J. Indian Soc. Remote Sens.* **34**, 39-46

- 479 (2006).
- 480 79. Raj, K. Recession and reconstruction of Milam Glacier, Kumaon Himalaya, observed with  
481 satellite imagery. *Curr. Sci.* **100**, 1420-1425 (2011).
- 482 80. Philip, G. & Prasad, M. Mapping repeated surges and retreat of glaciers using IRS-1C/1D  
483 data: a case study of Shaune Garang glacier, northwestern Himalaya. *Int. J. Appl. Earth*  
484 *Observ. Geoinf.* **6**,127-141 (2004).
- 485 81. Dobhal, D. Climate change and Himalayan glaciers: Observations and facts. South Asia  
486 Media Briefing Workshop on Climate Change. 24-25, November, 2010.
- 487 82. Kamp, U., Byrne, M. & Bolch, T. Glacier fluctuations between 1975 and 2008 in the Greater  
488 Himalaya Range of Zaskar, Southern Ladakh. *J. Mt. Sci.* **8**, 374-389 (2011).
- 489 83. Kumar, K. Dumka, R.K., Miral, M.S., Satyal, G.S. & Pant, M. Estimation of retreat rate of  
490 Gangotri glacier using rapid static and kinematic GPS survey. *Curr. Sci.* **94**(2), 258-261  
491 (2008).
- 492 84. Mayer, C., Lambrecht, A., Belò, M., Smiraglia, C. & Diolaiuti, G. Glaciological  
493 characteristics of the ablation zone of Baltoro glacier, Karakoram, Pakistan. *Ann. Glaciol.*  
494 **43**(1), 123-131 (2006).
- 495 85. Schmidt, S. & Nüsser, M. Fluctuations of Raikot Glacier during the past 70 years: a case  
496 study from the Nanga Parbat massif, north Pakistan. *J. Glaciol.* **55**, 949-959 (2009).
- 497 86. Raina, V. & Sangewar, C. Siachen Glacier of Karakoram mountains, Ladakh—its secular  
498 retreat. *J. Geol. Soc. India.* **70**, 11-16 (2007).
- 499 87. Shangguan, D., Liu, S., Ding, Y. & Ding, L. Monitoring results of glacier change in China  
500 Karakorum and Muztag Ata-Konggur Mountains by remote sensing. *J. Glaciol. Geocryol.* **26**,  
501 374-375 (2004). (In Chinese).
- 502 88. Shangguan, D., Liu, S., Ding, Y., Ding, L. & Li, G. Glacier changes at the head of Yrungskax  
503 river in the West Kunlun Mountains in the past 32 years. *Acta. Geogr. Sin.* **59**, 855-862  
504 (2004). (In Chinese)
- 505 89. Du, W., Qin, X., Liu, Y. & Wang, X. Variation of the Laohugou Glacier No.12 in the Qilian  
506 Mountains. *J. Glaciol. Geocryol.* **30**(3), 373-379 (2008). (In Chinese)
- 507 90. Fujita, K. & Nuimura, T. Spatially heterogeneous wastage of Himalayan glaciers. *Proc. Natl.*  
508 *Acad. Sci. USA.* **108**, 14011-14014 (2011).
- 509 91. Haeberli, W., Gärtner-Roer, I., Hoelzle, M., Paul, F. & Zemp, M. G. Glacier mass balance  
510 bulletin no. 10 (2006-2007). *IAHS (ICSJ), Zürich* (2009).
- 511 92. Azam, M.F. *et al.* From balance to imbalance: a shift in the dynamic behaviour of Chhota  
512 Shigri glacier, western Himalaya, India. *J. Glaciol.* **58**, 315-324 (2012).
- 513 93. Kehrwald, N. *et al.* Mass loss on Himalayan glacier endangers water resources. *Geophys. Res.*  
514 *Lett.* **35**, doi:10.1029/2008GL035556 (2008).
- 515 94. Wang, N., He, J., Pu, J., Jiang, X. & Jing, Z. Variations in equilibrium line altitude of the Qiyi  
516 Glacier, Qilian Mountains, over the past 50 years. *Chin. Sci. Bull.* **55**, 3810-3817 (2010).

- 517 95. Liu, S., Xie, Z., Song, G., Ma, L. & Ageta, Y. Mass balance of Kangwure (flat-top) Glacier on  
518 the north side of Mt. Xixiabangma, China. *Bull. Glaciol. Res.* **14**, 37-43 (1996).
- 519 96. Yao, T.,
- 520 97. Frauenfeld, O. W., T. Zhang, and M. C. Serreze (2005), Climate change and variability using  
521 European Centre for Medium-Range Weather Forecasts reanalysis (ERA-40) temperatures on  
522 the Tibetan Plateau, *Journal of Geophysical Research*, 110, doi:10.1029/2004JD005230.
- 523 98. You, Q., et al. (2010), Relationship between temperature trend magnitude, elevation and  
524 mean temperature in the Tibetan Plateau from homogenized surface stations and reanalysis  
525 data, *Global and Planetary Change*, 71, 124-133.
- 526 99. Adler, R. *et al.* The Version 2 Global Precipitation Climatology Project (GPCP) Monthly  
527 Precipitation Analysis (1979-Present). *J. Hydrometeor.* **4**, 1147-1167 (2003).
- 528
